# Supplementary material for: A Scoping Review of the Evidence for the Medicinal Use of Natural Honey in Animals
Source: Frontiers journal article supplement (doi:10.3389/fvets.2020.618301), 2021-01-18
Supplement: Data_Sheet_6.pdf [file Data_Sheet_6.pdf]

## Appendix F

### Biomedical Research Indications

#### Gastrointestinal

intraperitoneal adhesions  
fecal peritonitis  
*Helicobacter pylori* infection  
bromobenzene-induced liver damage  
aflatoxin-induced hepatotoxicity  
non-alcoholic steatohepatitis  
carbon tetrachloride-induced hepatotoxicity  
acetaminophen-induced hepatotoxicity  
intraabdominal adhesions and anastomotic healing  
ammonia-induced gastric lesions  
cisplatin-induced hepatotoxicity  
ethanol-induced hepatotoxicity  
ochratoxin-induced damage in the liver  
arsenite-induced liver damage  
cinnabar-induced hepatotoxicity  
colitis  
adhesion prevention and colonic anastomotic healing  
cisplatin-induced hepatotoxicity  
ulcerative colitis  
anastomotic wound healing  
liver injury  
obstructive jaundice  
alcohol-induced liver damage  
colonic anastomosis  
gastric ulcers  
lead-induced hepatotoxicity  
chlorpyrifos-induced hepatotoxicity  
hepatic disease  
paracetamol induced liver damage  
acetaminophen-induced hepatotoxicity  
metanil-yellow-induced hepatotoxicity  
acetylsalicylic acid-induced gastric ulcer  
aluminum-induced hepatotoxicity  
intestinal anastomotic wound healing  
N-ethylmaleimide-induced liver damage  
peritoneal adhesions with bacterial peritonitis

inflammatory bowel disease  
ulcerative colitis  
obstructive jaundice  
indomethacin-induced gastric lesions  
ischaemia-reperfusion-induced gastric mucosal lesions  
methotrexate mediated hepatotoxicity  
nonsteroidal anti-inflammatory drugs induced gastric ulcer  
ammonia-induced gastric lesions  
ethanol-, indomethacin-, and acidified aspirin-induced gastric lesions  
indomethacin-induced gastric ulcers  
ethanol-induced gastric mucosal damage  
bacterial translocation in obstructive jaundice  
gastric ulceration  
small bowel resection  
gastric mucosal injury  
anastomosis surgery  
diarrhea  
acetic acid-induced colitis  
ochratoxin A-induced oxidative stress

**Nervous system**

transient cerebral global ischemia  
status epilepticus  
pentylentetrazole-induced seizures  
paraquat toxicity  
nociception in offspring  
nociception  
neurological response to stress  
memory impairment in diabetes  
memory deficits  
memory and depressive-behaviour caused by noise stress  
lead acetate exposure  
kainic acid-induced oxidative stress in brain  
kainic acid-induced cortical damage  
cerebral hypoperfusion-induced neurodegeneration, cognitive function  
arsenite-induced brain damage  
anxiety, age-related memory loss  
aluminum chloride-induced neurotoxicity  
depression  
picrotoxin-induced seizures

**Cardiovascular**

ventricular hypertrophy, aortic constriction  
vasospasm  
pulmonary thromboembolism  
myocardial infarction  
ischemia/reperfusion - induced cardiac  
arrhythmias  
hypertension  
congestive heart failure  
cerebral hypoperfusion  
cardiovascular disease  
atherosclerosis  
diabetic hypertension  
vasomotor dysfunction  
epinephrine-induced cardiac disorders

**Lymphatic/immune**

Toxoplasmosis  
*Staphylococcus aureus* biofilm-associated  
sinusitis  
Staphylococcal infection  
Typhoid  
*Trypanosoma brucei* infection  
*Schistosoma mansoni* infection  
*Salmonella* infection  
*Streptococcus pyogenes* infection  
rheumatoid arthritis  
*Klebsiella pneumoniae* ST11 systemic infection  
Aspergillosis infection  
arsenite-induced clastogenicity

**Metabolic/endocrine**

polycystic ovary syndrome  
obesity  
menopausal syndrome  
glycemic control in diabetes

**Urinary/renal**

urethral stricture  
urethral injury  
renal ischemia/reperfusion injury  
prostatitis

oxidative stress in the kidney  
ochratoxin-induced damage in the kidney  
methotrexate (MTX) induced kidney  
toxicity  
melamine toxicity in kidney  
lead-induced renal toxicity  
diabetic kidney damage  
cisplatin-induced nephrotoxicity  
carbon tetrachloride-induced  
nephrotoxicity  
amikacin-induced nephrotoxicity  
aflatoxin-induced nephrotoxicity  
acetaminophen-induced nephrotoxicity

**Reproductive**

testis injury  
pain behaviour in offspring  
spermatogenesis  
octylphenol toxicity on testes  
noise stress effect on testes  
nicotine ingestion on testes and testosterone  
nicotine effect on testicular functions  
infertility due to noise stress  
diabetes-induced damages in testes  
cigarette smoke-induced testicular damage  
cigarette smoke on sexual behaviour and fertility  
bisphenol-induced ovarian toxicity  
ischemia-reperfusion injury of testis  
chemotherapy-induced testicular damage

**Wounds**

general wound healing  
tooth extraction  
oral mucosal ulcers  
intraoral wound healing

**Other Dermatological**

paw inflammation  
eschar  
debridement  
ear oedema

atopic dermatitis  
paw oedema

**Other**

tumour proliferation  
tumour implantation in surgical wounds  
tumour growth  
trichlorfon toxicity  
tartrazine toxicity  
sodium arsenite toxicity  
*Pseudomonas aeruginosa* induced stromal keratitis  
peridural fibrosis after laminectomy  
paraquat toxicity on lungs  
mycotoxin ingestion  
menopausal depression under stress  
memory in menopause with stress  
melamine toxicity  
mammary carcinoma  
lymphoid leukemia  
lipopolysaccharide-induced endotoxemia  
lead-induced anemia  
lead acetate contamination  
keratitis  
epidural fibrosis following laminectomy  
dry eyes  
cornea alkali burns  
carrageenan-induced inflammation  
carbon tetrachloride-induced hematological changes  
carbon tetrachloride toxicity  
cadmium toxicity  
breast cancer  
asthma  
arthritis  
anemia  
allergic asthma  
alkali injury to the eye  
alcohol intoxication  
acute blood loss  
foreign-body granuloma  
cyclophosphamide genotoxicity

corneal abrasions  
endotoxin-induced keratitis  
bacterial conjunctivitis  
formaldehyde-induced arthritis
