# Supplementary material for: A Scoping Review of the Evidence for the Medicinal Use of Natural Honey in Animals
Source: Front Vet Sci. 2021 Jan 18;7:618301. doi: 10.3389/fvets.2020.618301 (PMC7847899; doi:10.3389/fvets.2020.618301)
Supplement: Table 1 — Raw data. [file Table_1.XLSX]

## Sheet: biomed.onetrial
Refid	Level	Year of publication	Country of study - as reported or, if not reported, country of corresponding author affiliation	Animal species (at species level, dont need specifics - e.g. Wistar rat would just be rat) -> Rat	Animal species (at species level, dont need specifics - e.g. Wistar rat would just be rat) -> Mouse / Mice	Animal species (at species level, dont need specifics - e.g. Wistar rat would just be rat) -> Rabbit	Animal species (at species level, dont need specifics - e.g. Wistar rat would just be rat) -> Pigs	Animal species (at species level, dont need specifics - e.g. Wistar rat would just be rat) -> Cat	Animal species (at species level, dont need specifics - e.g. Wistar rat would just be rat) -> Dog	Animal species (at species level, dont need specifics - e.g. Wistar rat would just be rat) -> Horse	Animal species (at species level, dont need specifics - e.g. Wistar rat would just be rat) -> Cattle	Animal species (at species level, dont need specifics - e.g. Wistar rat would just be rat) -> Chicken	Animal species (at species level, dont need specifics - e.g. Wistar rat would just be rat) -> Buffalo	Animal species (at species level, dont need specifics - e.g. Wistar rat would just be rat) -> Donkey	Animal species (at species level, dont need specifics - e.g. Wistar rat would just be rat) -> Goat	Animal species (at species level, dont need specifics - e.g. Wistar rat would just be rat) -> Mule	Animal species (at species level, dont need specifics - e.g. Wistar rat would just be rat) -> Fish	Animal species (at species level, dont need specifics - e.g. Wistar rat would just be rat) -> Quail	Animal species (at species level, dont need specifics - e.g. Wistar rat would just be rat) -> Sheep	Animal species (at species level, dont need specifics - e.g. Wistar rat would just be rat) -> Gerbils	Animal species (at species level, dont need specifics - e.g. Wistar rat would just be rat) -> Macaque	Animal species (at species level, dont need specifics - e.g. Wistar rat would just be rat) -> Ginea pigs	Animal species (at species level, dont need specifics - e.g. Wistar rat would just be rat) -> Tortoise	What study design was used (based on what they did, not based on how it was reported)?	Was this translational research (i.e. an animal model for evaluating potential treatments for humans)	Was it intended to prevent or treat (therapeutic)?	Were there multiple interventions with honey and/or honey derivatives? (i.e., head-to-head comparison of different honeys against a control group)	How many unique honey and/or honey derivative interventions were studied?	For the first intervention (alphabetically), is honey a component (alone or in combination) of the intervention?	For the first intervention (alphabetically), was it a commercial medicinal honey?	For the first intervention (alphabetically), was it a commercial medicinal honey?_comment	For the first intervention (alphabetically), is a honey derivative a component (alone or in combination) of the intervention?	For the first intervention (alphabetically), is a honey derivative a component (alone or in combination) of the intervention?_comment	Were there other components to the first intervention?	What were the other components to the first intervention? -> Drug	What were the other components to the first intervention? -> Other bee products (Specify, e.g., bee venom, propolis, bee pollen, royal jelly, beeswax, bee bread)	What were the other components to the first intervention? -> Other bee products (Specify, e.g., bee venom, propolis, bee pollen, royal jelly, beeswax, bee bread) (COMMENT)	What were the other components to the first intervention? -> Other (specify)	What were the other components to the first intervention? -> Other (specify) (COMMENT)	For the second intervention (alphabetically), is honey a component (alone or in combination) of the intervention?	For the second intervention (alphabetically), was it a commercial medicinal honey?	For the second intervention (alphabetically), was it a commercial medicinal honey?_comment	For the second intervention (alphabetically), is a honey derivative a component (alone or in combination) of the intervention?	For the second intervention (alphabetically), is a honey derivative a component (alone or in combination) of the intervention?_comment	Were there other components to the second intervention?	What were the other components of the second intervention? -> Herbal product	What were the other components of the second intervention? -> Drug	What were the other components of the second intervention? -> Other bee products (Specify, e.g., bee venom, propolis, bee pollen, royal jelly, beeswax, bee bread)	What were the other components of the second intervention? -> Other bee products (Specify, e.g., bee venom, propolis, bee pollen, royal jelly, beeswax, bee bread) (COMMENT)
10052	3	2017	Italy	Rat	NA	NA	NA	NA	NA	NA	NA	NA	NA	NA	NA	NA	NA	NA	NA	NA	NA	NA	NA	Experimental - deliberate disease model	Yes	Prevent	No	NA	NA	NA	NA	NA	NA	NA	NA	NA	NA	NA	NA	NA	NA	NA	NA	NA	NA	NA	NA	NA	NA
10315	3	2011	Egypt	Rat	NA	NA	NA	NA	NA	NA	NA	NA	NA	NA	NA	NA	NA	NA	NA	NA	NA	NA	NA	Experimental - deliberate disease model	Yes	Prevent	No	NA	NA	NA	NA	NA	NA	NA	NA	NA	NA	NA	NA	NA	NA	NA	NA	NA	NA	NA	NA	NA	NA
18453	3	2018	Iran	NA	Mouse / Mice	NA	NA	NA	NA	NA	NA	NA	NA	NA	NA	NA	NA	NA	NA	NA	NA	NA	NA	Experimental - deliberate disease model	Yes	Treat	No	NA	NA	NA	NA	NA	NA	NA	NA	NA	NA	NA	NA	NA	NA	NA	NA	NA	NA	NA	NA	NA	NA
18461	3	2018	Iran	Rat	NA	NA	NA	NA	NA	NA	NA	NA	NA	NA	NA	NA	NA	NA	NA	NA	NA	NA	NA	Experimental - deliberate disease model	Yes	Treat	Yes	2	Yes	No (specify label if provided, e.g., &quot;turkish honey&quot;)	NA	No	NA	No	NA	NA	NA	NA	NA	Yes	No (specify label if provided, e.g., &quot;turkish honey&quot;)	NA	No	NA	Yes	NA	NA	NA	NA
18553	3	2012	Malaysia	Rat	NA	NA	NA	NA	NA	NA	NA	NA	NA	NA	NA	NA	NA	NA	NA	NA	NA	NA	NA	Experimental - deliberate disease model	Yes	Prevent	No	NA	NA	NA	NA	NA	NA	NA	NA	NA	NA	NA	NA	NA	NA	NA	NA	NA	NA	NA	NA	NA	NA
18592	3	2010	Iran	NA	Mouse / Mice	NA	NA	NA	NA	NA	NA	NA	NA	NA	NA	NA	NA	NA	NA	NA	NA	NA	NA	Experimental - deliberate disease model	Yes	Treat	No	NA	NA	NA	NA	NA	NA	NA	NA	NA	NA	NA	NA	NA	NA	NA	NA	NA	NA	NA	NA	NA	NA
18754	3	2002	USA	NA	NA	Rabbit	NA	NA	NA	NA	NA	NA	NA	NA	NA	NA	NA	NA	NA	NA	NA	NA	NA	Experimental - deliberate disease model	Yes	Prevent	Yes	2	Yes	No (specify label if provided, e.g., &quot;turkish honey&quot;)	buckwheat honey	No	NA	No	NA	NA	NA	NA	NA	Yes	No (specify label if provided, e.g., &quot;turkish honey&quot;)	soy honey	No	NA	No	NA	NA	NA	NA
19115	3	2019	Japan	NA	Mouse / Mice	NA	NA	NA	NA	NA	NA	NA	NA	NA	NA	NA	NA	NA	NA	NA	NA	NA	NA	Experimental - deliberate disease model	Yes	Treat	No	NA	NA	NA	NA	NA	NA	NA	NA	NA	NA	NA	NA	NA	NA	NA	NA	NA	NA	NA	NA	NA	NA
19126	3	2018	India	NA	Mouse / Mice	NA	NA	NA	NA	NA	NA	NA	NA	NA	NA	NA	NA	NA	NA	NA	NA	NA	NA	Experimental - deliberate disease model	Yes	Treat	No	NA	NA	NA	NA	NA	NA	NA	NA	NA	NA	NA	NA	NA	NA	NA	NA	NA	NA	NA	NA	NA	NA
19128	3	2018	Iran	NA	Mouse / Mice	NA	NA	NA	NA	NA	NA	NA	NA	NA	NA	NA	NA	NA	NA	NA	NA	NA	NA	Experimental - deliberate disease model	Yes	Treat	No	NA	NA	NA	NA	NA	NA	NA	NA	NA	NA	NA	NA	NA	NA	NA	NA	NA	NA	NA	NA	NA	NA
19145	3	2018	India	Rat	NA	NA	NA	NA	NA	NA	NA	NA	NA	NA	NA	NA	NA	NA	NA	NA	NA	NA	NA	Experimental - deliberate disease model	Yes	Treat	Yes	2	Yes	Yes (specify product name)	Manuka Leptospermum honey (Medihoney, Derma Sciences Inc.)	No	NA	No	NA	NA	NA	NA	NA	Yes	Yes (specify product name)	Manuka Leptospermum honey (Medihoney, Derma Sciences Inc.)	No	NA	Yes	NA	NA	NA	NA
19185	3	2018	China	NA	Mouse / Mice	NA	NA	NA	NA	NA	NA	NA	NA	NA	NA	NA	NA	NA	NA	NA	NA	NA	NA	Experimental - deliberate disease model	Yes	Prevent	No	NA	NA	NA	NA	NA	NA	NA	NA	NA	NA	NA	NA	NA	NA	NA	NA	NA	NA	NA	NA	NA	NA
19198	3	2017	Malaysia	Rat	NA	NA	NA	NA	NA	NA	NA	NA	NA	NA	NA	NA	NA	NA	NA	NA	NA	NA	NA	Experimental - deliberate disease model	Yes	Prevent	No	NA	NA	NA	NA	NA	NA	NA	NA	NA	NA	NA	NA	NA	NA	NA	NA	NA	NA	NA	NA	NA	NA
19202	3	2017	Nigeria	Rat	NA	NA	NA	NA	NA	NA	NA	NA	NA	NA	NA	NA	NA	NA	NA	NA	NA	NA	NA	Experimental - deliberate disease model	Yes	Treat	No	NA	NA	NA	NA	NA	NA	NA	NA	NA	NA	NA	NA	NA	NA	NA	NA	NA	NA	NA	NA	NA	NA
19248	3	2016	Turkey	Rat	NA	NA	NA	NA	NA	NA	NA	NA	NA	NA	NA	NA	NA	NA	NA	NA	NA	NA	NA	Experimental - deliberate disease model	Yes	Prevent	No	NA	NA	NA	NA	NA	NA	NA	NA	NA	NA	NA	NA	NA	NA	NA	NA	NA	NA	NA	NA	NA	NA
19275	3	2016	China	Rat	NA	NA	NA	NA	NA	NA	NA	NA	NA	NA	NA	NA	NA	NA	NA	NA	NA	NA	NA	Experimental - deliberate disease model	Yes	Prevent	No	NA	NA	NA	NA	NA	NA	NA	NA	NA	NA	NA	NA	NA	NA	NA	NA	NA	NA	NA	NA	NA	NA
19282	3	2016	Egypt	NA	Mouse / Mice	NA	NA	NA	NA	NA	NA	NA	NA	NA	NA	NA	NA	NA	NA	NA	NA	NA	NA	Experimental - deliberate disease model	Yes	Treat	Yes	2	Yes	No (specify label if provided, e.g., &quot;turkish honey&quot;)	clover honey	No	NA	Yes	NA	NA	NA	Other (specify)	chitosan nanofibre wound dressing	Yes	No (specify label if provided, e.g., &quot;turkish honey&quot;)	clover honey	No	NA	Yes	Herbal product	NA	NA	NA
19332	3	2014	Malaysia	Rat	NA	NA	NA	NA	NA	NA	NA	NA	NA	NA	NA	NA	NA	NA	NA	NA	NA	NA	NA	Experimental - deliberate disease model	Yes	Prevent	No	NA	NA	NA	NA	NA	NA	NA	NA	NA	NA	NA	NA	NA	NA	NA	NA	NA	NA	NA	NA	NA	NA
19339	3	2014	Malaysia	Rat	NA	NA	NA	NA	NA	NA	NA	NA	NA	NA	NA	NA	NA	NA	NA	NA	NA	NA	NA	Experimental - deliberate disease model	Yes	Prevent	No	NA	NA	NA	NA	NA	NA	NA	NA	NA	NA	NA	NA	NA	NA	NA	NA	NA	NA	NA	NA	NA	NA
19413	3	2012	Egypt	Rat	NA	NA	NA	NA	NA	NA	NA	NA	NA	NA	NA	NA	NA	NA	NA	NA	NA	NA	NA	Experimental - deliberate disease model	Yes	Prevent	Yes	2	Yes	No (specify label if provided, e.g., &quot;turkish honey&quot;)	sider honey	No	NA	No	NA	NA	NA	NA	NA	Yes	No (specify label if provided, e.g., &quot;turkish honey&quot;)	sider honey	No	NA	Yes	Herbal product	NA	NA	NA
19432	3	2011	Malaysia	NA	NA	Rabbit	NA	NA	NA	NA	NA	NA	NA	NA	NA	NA	NA	NA	NA	NA	NA	NA	NA	Experimental - deliberate disease model	Yes	Treat	No	NA	NA	NA	NA	NA	NA	NA	NA	NA	NA	NA	NA	NA	NA	NA	NA	NA	NA	NA	NA	NA	NA
19483	3	2009	India	Rat	NA	NA	NA	NA	NA	NA	NA	NA	NA	NA	NA	NA	NA	NA	NA	NA	NA	NA	NA	Experimental - deliberate disease model	Yes	Prevent	No	NA	NA	NA	NA	NA	NA	NA	NA	NA	NA	NA	NA	NA	NA	NA	NA	NA	NA	NA	NA	NA	NA
19502	3	2008	Turkey	Rat	NA	NA	NA	NA	NA	NA	NA	NA	NA	NA	NA	NA	NA	NA	NA	NA	NA	NA	NA	Experimental - deliberate disease model	Yes	Prevent	No	NA	NA	NA	NA	NA	NA	NA	NA	NA	NA	NA	NA	NA	NA	NA	NA	NA	NA	NA	NA	NA	NA
19539	3	2003	Saudi Arabia	Rat	NA	NA	NA	NA	NA	NA	NA	NA	NA	NA	NA	NA	NA	NA	NA	NA	NA	NA	NA	Experimental - deliberate disease model	Yes	Prevent	No	NA	NA	NA	NA	NA	NA	NA	NA	NA	NA	NA	NA	NA	NA	NA	NA	NA	NA	NA	NA	NA	NA
19546	3	2003	United Arab Emirates	NA	NA	NA	NA	NA	NA	NA	NA	NA	NA	NA	NA	NA	NA	NA	Sheep	NA	NA	NA	NA	Experimental - deliberate disease model	Yes	Prevent	No	NA	NA	NA	NA	NA	NA	NA	NA	NA	NA	NA	NA	NA	NA	NA	NA	NA	NA	NA	NA	NA	NA
19569	3	1997	Saudi Arabia	Rat	NA	NA	NA	NA	NA	NA	NA	NA	NA	NA	NA	NA	NA	NA	NA	NA	NA	NA	NA	Experimental - deliberate disease model	Yes	Prevent	Yes	2	Yes	No (specify label if provided, e.g., &quot;turkish honey&quot;)	NA	No	NA	No	NA	NA	NA	NA	NA	Yes	No (specify label if provided, e.g., &quot;turkish honey&quot;)	NA	No	NA	Yes	NA	NA	NA	NA
19617	3	2019	Iran	Rat	NA	NA	NA	NA	NA	NA	NA	NA	NA	NA	NA	NA	NA	NA	NA	NA	NA	NA	NA	Experimental - deliberate disease model	Yes	Treat	No	NA	NA	NA	NA	NA	NA	NA	NA	NA	NA	NA	NA	NA	NA	NA	NA	NA	NA	NA	NA	NA	NA
19647	3	2018	Saudi Arabia	Rat	NA	NA	NA	NA	NA	NA	NA	NA	NA	NA	NA	NA	NA	NA	NA	NA	NA	NA	NA	Experimental - deliberate disease model	Yes	Prevent	Yes	2	Yes	Yes (specify product name)	Royal Bee 20+ Active MAN Honey 100% (Royal Bee, New Zealand)	No	NA	No	NA	NA	NA	NA	NA	Yes	No (specify label if provided, e.g., &quot;turkish honey&quot;)	talh honey	No	NA	No	NA	NA	NA	NA
19680	3	2017	Malaysia	Rat	NA	NA	NA	NA	NA	NA	NA	NA	NA	NA	NA	NA	NA	NA	NA	NA	NA	NA	NA	Experimental - deliberate disease model	Yes	Prevent	No	NA	NA	NA	NA	NA	NA	NA	NA	NA	NA	NA	NA	NA	NA	NA	NA	NA	NA	NA	NA	NA	NA
19686	3	2017	China	NA	Mouse / Mice	NA	NA	NA	NA	NA	NA	NA	NA	NA	NA	NA	NA	NA	NA	NA	NA	NA	NA	Experimental - deliberate disease model	Yes	Prevent	No	NA	NA	NA	NA	NA	NA	NA	NA	NA	NA	NA	NA	NA	NA	NA	NA	NA	NA	NA	NA	NA	NA
19692	3	2017	Croatia	NA	Mouse / Mice	NA	NA	NA	NA	NA	NA	NA	NA	NA	NA	NA	NA	NA	NA	NA	NA	NA	NA	Experimental - deliberate disease model	Yes	Prevent	No	NA	NA	NA	NA	NA	NA	NA	NA	NA	NA	NA	NA	NA	NA	NA	NA	NA	NA	NA	NA	NA	NA
19775	3	2015	Egypt	NA	Mouse / Mice	NA	NA	NA	NA	NA	NA	NA	NA	NA	NA	NA	NA	NA	NA	NA	NA	NA	NA	Experimental - deliberate disease model	Yes	Treat	No	NA	NA	NA	NA	NA	NA	NA	NA	NA	NA	NA	NA	NA	NA	NA	NA	NA	NA	NA	NA	NA	NA
19802	3	2015	Nigeria	Rat	NA	NA	NA	NA	NA	NA	NA	NA	NA	NA	NA	NA	NA	NA	NA	NA	NA	NA	NA	Experimental - deliberate disease model	Yes	Prevent	No	NA	NA	NA	NA	NA	NA	NA	NA	NA	NA	NA	NA	NA	NA	NA	NA	NA	NA	NA	NA	NA	NA
19810	3	2014	Cameroon	Rat	NA	NA	NA	NA	NA	NA	NA	NA	NA	NA	NA	NA	NA	NA	NA	NA	NA	NA	NA	Experimental - deliberate disease model	Yes	Treat	No	NA	NA	NA	NA	NA	NA	NA	NA	NA	NA	NA	NA	NA	NA	NA	NA	NA	NA	NA	NA	NA	NA
19879	3	2012	China	NA	NA	Rabbit	NA	NA	NA	NA	NA	NA	NA	NA	NA	NA	NA	NA	NA	NA	NA	NA	NA	Experimental - deliberate disease model	Yes	Treat	No	NA	NA	NA	NA	NA	NA	NA	NA	NA	NA	NA	NA	NA	NA	NA	NA	NA	NA	NA	NA	NA	NA
19898	3	2011	Brazil	Rat	NA	NA	NA	NA	NA	NA	NA	NA	NA	NA	NA	NA	NA	NA	NA	NA	NA	NA	NA	Experimental - deliberate disease model	Yes	Treat	No	NA	NA	NA	NA	NA	NA	NA	NA	NA	NA	NA	NA	NA	NA	NA	NA	NA	NA	NA	NA	NA	NA
19916	3	2010	Malaysia	Rat	NA	NA	NA	NA	NA	NA	NA	NA	NA	NA	NA	NA	NA	NA	NA	NA	NA	NA	NA	Experimental - deliberate disease model	Yes	Treat	No	NA	NA	NA	NA	NA	NA	NA	NA	NA	NA	NA	NA	NA	NA	NA	NA	NA	NA	NA	NA	NA	NA
20249	3	2016	South Korea	NA	Mouse / Mice	NA	NA	NA	NA	NA	NA	NA	NA	NA	NA	NA	NA	NA	NA	NA	NA	NA	NA	Experimental - deliberate disease model	Yes	Prevent	No	NA	NA	NA	NA	NA	NA	NA	NA	NA	NA	NA	NA	NA	NA	NA	NA	NA	NA	NA	NA	NA	NA
20293	3	2014	Nigeria	Rat	NA	NA	NA	NA	NA	NA	NA	NA	NA	NA	NA	NA	NA	NA	NA	NA	NA	NA	NA	Experimental - deliberate disease model	Yes	Prevent	No	NA	NA	NA	NA	NA	NA	NA	NA	NA	NA	NA	NA	NA	NA	NA	NA	NA	NA	NA	NA	NA	NA
20344	3	2013	China	Rat	NA	NA	NA	NA	NA	NA	NA	NA	NA	NA	NA	NA	NA	NA	NA	NA	NA	NA	NA	Experimental - deliberate disease model	Yes	Prevent	No	NA	NA	NA	NA	NA	NA	NA	NA	NA	NA	NA	NA	NA	NA	NA	NA	NA	NA	NA	NA	NA	NA
20395	3	2011	South Korea	NA	NA	NA	NA	NA	NA	NA	NA	NA	NA	NA	NA	NA	NA	NA	NA	Gerbils	NA	NA	NA	Experimental - deliberate disease model	Yes	Treat	No	NA	NA	NA	NA	NA	NA	NA	NA	NA	NA	NA	NA	NA	NA	NA	NA	NA	NA	NA	NA	NA	NA
20452	3	2008	Palestine	Rat	NA	NA	NA	NA	NA	NA	NA	NA	NA	NA	NA	NA	NA	NA	NA	NA	NA	NA	NA	Experimental - deliberate disease model	Yes	Treat	No	NA	NA	NA	NA	NA	NA	NA	NA	NA	NA	NA	NA	NA	NA	NA	NA	NA	NA	NA	NA	NA	NA
20878	3	2007	India	Rat	NA	NA	NA	NA	NA	NA	NA	NA	NA	NA	NA	NA	NA	NA	NA	NA	NA	NA	NA	Experimental - deliberate disease model	Yes	Treat	No	NA	NA	NA	NA	NA	NA	NA	NA	NA	NA	NA	NA	NA	NA	NA	NA	NA	NA	NA	NA	NA	NA
21197	3	2016	Brazil	Rat	NA	NA	NA	NA	NA	NA	NA	NA	NA	NA	NA	NA	NA	NA	NA	NA	NA	NA	NA	Experimental - deliberate disease model	Yes	Prevent	No	NA	NA	NA	NA	NA	NA	NA	NA	NA	NA	NA	NA	NA	NA	NA	NA	NA	NA	NA	NA	NA	NA
21796	3	2010	Egypt	Rat	NA	NA	NA	NA	NA	NA	NA	NA	NA	NA	NA	NA	NA	NA	NA	NA	NA	NA	NA	Experimental - deliberate disease model	Yes	Prevent	No	NA	NA	NA	NA	NA	NA	NA	NA	NA	NA	NA	NA	NA	NA	NA	NA	NA	NA	NA	NA	NA	NA
21860	3	2012	Malaysia	Rat	NA	NA	NA	NA	NA	NA	NA	NA	NA	NA	NA	NA	NA	NA	NA	NA	NA	NA	NA	Experimental - deliberate disease model	Yes	Treat	No	NA	NA	NA	NA	NA	NA	NA	NA	NA	NA	NA	NA	NA	NA	NA	NA	NA	NA	NA	NA	NA	NA
21865	3	2005	India	NA	NA	Rabbit	NA	NA	NA	NA	NA	NA	NA	NA	NA	NA	NA	NA	NA	NA	NA	NA	NA	Experimental - deliberate disease model	Yes	Treat	No	NA	NA	NA	NA	NA	NA	NA	NA	NA	NA	NA	NA	NA	NA	NA	NA	NA	NA	NA	NA	NA	NA
21866	3	2010	Turkey	NA	NA	Rabbit	NA	NA	NA	NA	NA	NA	NA	NA	NA	NA	NA	NA	NA	NA	NA	NA	NA	Experimental - deliberate disease model	Yes	Treat	Yes	3	Yes	No (specify label if provided, e.g., &quot;turkish honey&quot;)	blossom multifloral honey	No	NA	Yes	Drug	NA	NA	NA	NA	Yes	No (specify label if provided, e.g., &quot;turkish honey&quot;)	chestnut (Castanea sativa) honey	No	NA	Yes	NA	Drug	NA	NA
21877	3	2014	Nigeria	NA	NA	Rabbit	NA	NA	NA	NA	NA	NA	NA	NA	NA	NA	NA	NA	NA	NA	NA	NA	NA	Experimental - deliberate disease model	Yes	Treat	Yes	2	Yes	No (specify label if provided, e.g., &quot;turkish honey&quot;)	NA	No	NA	No	NA	NA	NA	NA	NA	Yes	No (specify label if provided, e.g., &quot;turkish honey&quot;)	NA	No	NA	Yes	NA	NA	NA	NA
21896	3	2004	Turkey	Rat	NA	NA	NA	NA	NA	NA	NA	NA	NA	NA	NA	NA	NA	NA	NA	NA	NA	NA	NA	Experimental - deliberate disease model	Yes	Treat	No	NA	NA	NA	NA	NA	NA	NA	NA	NA	NA	NA	NA	NA	NA	NA	NA	NA	NA	NA	NA	NA	NA
22038	3	2014	Nigeria	Rat	NA	NA	NA	NA	NA	NA	NA	NA	NA	NA	NA	NA	NA	NA	NA	NA	NA	NA	NA	Experimental - deliberate disease model	Yes	Treat	No	NA	NA	NA	NA	NA	NA	NA	NA	NA	NA	NA	NA	NA	NA	NA	NA	NA	NA	NA	NA	NA	NA
22047	3	2013	Japan	NA	Mouse / Mice	NA	NA	NA	NA	NA	NA	NA	NA	NA	NA	NA	NA	NA	NA	NA	NA	NA	NA	Experimental - deliberate disease model	Yes	Treat	Yes	3	Yes	No (specify label if provided, e.g., &quot;turkish honey&quot;)	acacia honey	No	NA	No	NA	NA	NA	NA	NA	Yes	No (specify label if provided, e.g., &quot;turkish honey&quot;)	buckwheat flour honey	No	NA	No	NA	NA	NA	NA
22201	3	2004	Poland	NA	NA	NA	Pigs	NA	NA	NA	NA	NA	NA	NA	NA	NA	NA	NA	NA	NA	NA	NA	NA	Experimental - deliberate disease model	Yes	Treat	No	NA	NA	NA	NA	NA	NA	NA	NA	NA	NA	NA	NA	NA	NA	NA	NA	NA	NA	NA	NA	NA	NA
22216	3	2007	Iran	NA	NA	NA	NA	NA	Dog	NA	NA	NA	NA	NA	NA	NA	NA	NA	NA	NA	NA	NA	NA	Experimental - deliberate disease model	Yes	Treat	No	NA	NA	NA	NA	NA	NA	NA	NA	NA	NA	NA	NA	NA	NA	NA	NA	NA	NA	NA	NA	NA	NA
22246	3	2012	Malaysia	Rat	NA	NA	NA	NA	NA	NA	NA	NA	NA	NA	NA	NA	NA	NA	NA	NA	NA	NA	NA	Experimental - deliberate disease model	Yes	Prevent	No	NA	NA	NA	NA	NA	NA	NA	NA	NA	NA	NA	NA	NA	NA	NA	NA	NA	NA	NA	NA	NA	NA
36911	3	2019	Malaysia	Rat	NA	NA	NA	NA	NA	NA	NA	NA	NA	NA	NA	NA	NA	NA	NA	NA	NA	NA	NA	Experimental - deliberate disease model	Yes	Prevent	Yes	2	Yes	No (specify label if provided, e.g., &quot;turkish honey&quot;)	tualang honey	No	NA	No	NA	NA	NA	NA	NA	Yes	No (specify label if provided, e.g., &quot;turkish honey&quot;)	tualang honey	No	NA	Yes	NA	NA	NA	NA
36918	3	2019	India	Rat	NA	NA	NA	NA	NA	NA	NA	NA	NA	NA	NA	NA	NA	NA	NA	NA	NA	NA	NA	Experimental - deliberate disease model	Yes	Prevent	No	NA	NA	NA	NA	NA	NA	NA	NA	NA	NA	NA	NA	NA	NA	NA	NA	NA	NA	NA	NA	NA	NA
36969	3	2019	China	Rat	NA	NA	NA	NA	NA	NA	NA	NA	NA	NA	NA	NA	NA	NA	NA	NA	NA	NA	NA	Experimental - deliberate disease model	Yes	Prevent	No	NA	NA	NA	NA	NA	NA	NA	NA	NA	NA	NA	NA	NA	NA	NA	NA	NA	NA	NA	NA	NA	NA
37109	3	2019	Turkey	Rat	NA	NA	NA	NA	NA	NA	NA	NA	NA	NA	NA	NA	NA	NA	NA	NA	NA	NA	NA	Experimental - deliberate disease model	Yes	Prevent	No	NA	NA	NA	NA	NA	NA	NA	NA	NA	NA	NA	NA	NA	NA	NA	NA	NA	NA	NA	NA	NA	NA
37124	3	2018	Saudi Arabia	Rat	NA	NA	NA	NA	NA	NA	NA	NA	NA	NA	NA	NA	NA	NA	NA	NA	NA	NA	NA	Experimental - deliberate disease model	Yes	Prevent	No	NA	NA	NA	NA	NA	NA	NA	NA	NA	NA	NA	NA	NA	NA	NA	NA	NA	NA	NA	NA	NA	NA
37132	3	2019	India	Rat	NA	NA	NA	NA	NA	NA	NA	NA	NA	NA	NA	NA	NA	NA	NA	NA	NA	NA	NA	Experimental - deliberate disease model	Yes	Treat	Yes	2	Yes	No (specify label if provided, e.g., &quot;turkish honey&quot;)	acacia honey	No	NA	No	NA	NA	NA	NA	NA	Yes	No (specify label if provided, e.g., &quot;turkish honey&quot;)	manuka honey	No	NA	No	NA	NA	NA	NA
37161	3	2019	Malaysia	NA	NA	Rabbit	NA	NA	NA	NA	NA	NA	NA	NA	NA	NA	NA	NA	NA	NA	NA	NA	NA	Experimental - deliberate disease model	Yes	Treat	Yes	2	Yes	No (specify label if provided, e.g., &quot;turkish honey&quot;)	tualang honey	No	NA	No	NA	NA	NA	NA	NA	Yes	No (specify label if provided, e.g., &quot;turkish honey&quot;)	tualang honey	No	NA	Yes	NA	Drug	NA	NA
37298	3	2019	Indonesia	Rat	NA	NA	NA	NA	NA	NA	NA	NA	NA	NA	NA	NA	NA	NA	NA	NA	NA	NA	NA	Experimental - deliberate disease model	Yes	Prevent	No	NA	NA	NA	NA	NA	NA	NA	NA	NA	NA	NA	NA	NA	NA	NA	NA	NA	NA	NA	NA	NA	NA
37389	3	2019	Malaysia	Rat	NA	NA	NA	NA	NA	NA	NA	NA	NA	NA	NA	NA	NA	NA	NA	NA	NA	NA	NA	Experimental - deliberate disease model	Yes	Prevent	No	NA	NA	NA	NA	NA	NA	NA	NA	NA	NA	NA	NA	NA	NA	NA	NA	NA	NA	NA	NA	NA	NA
37443	3	2018	Indonesia	NA	Mouse / Mice	NA	NA	NA	NA	NA	NA	NA	NA	NA	NA	NA	NA	NA	NA	NA	NA	NA	NA	Experimental - deliberate disease model	Yes	Treat	Yes	2	Yes	Yes (specify product name)	indonesian honey	No	NA	Yes	NA	NA	NA	Other (specify)	plasma jet treatment	Yes	Yes (specify product name)	Manuka honey with Unique Manuka Factor (UMF) 5 +	No	NA	Yes	NA	NA	NA	NA
37492	3	2018	India	Rat	NA	NA	NA	NA	NA	NA	NA	NA	NA	NA	NA	NA	NA	NA	NA	NA	NA	NA	NA	Experimental - deliberate disease model	Yes	Treat	Yes	3	Yes	No (specify label if provided, e.g., &quot;turkish honey&quot;)	NA	No	NA	No	NA	NA	NA	NA	NA	Yes	No (specify label if provided, e.g., &quot;turkish honey&quot;)	NA	No	NA	Yes	NA	NA	NA	NA
37547	3	2018	Egypt	Rat	NA	NA	NA	NA	NA	NA	NA	NA	NA	NA	NA	NA	NA	NA	NA	NA	NA	NA	NA	Experimental - deliberate disease model	Yes	Prevent	No	NA	NA	NA	NA	NA	NA	NA	NA	NA	NA	NA	NA	NA	NA	NA	NA	NA	NA	NA	NA	NA	NA
37579	3	2018	Turkey	Rat	NA	NA	NA	NA	NA	NA	NA	NA	NA	NA	NA	NA	NA	NA	NA	NA	NA	NA	NA	Experimental - deliberate disease model	Yes	Treat	Yes	2	Yes	No (specify label if provided, e.g., &quot;turkish honey&quot;)	blossom honey	No	NA	No	NA	NA	NA	NA	NA	Yes	No (specify label if provided, e.g., &quot;turkish honey&quot;)	mad honey	No	NA	No	NA	NA	NA	NA
37588	3	2018	India	Rat	NA	NA	NA	NA	NA	NA	NA	NA	NA	NA	NA	NA	NA	NA	NA	NA	NA	NA	NA	Experimental - deliberate disease model	Yes	Treat	Yes	4	Yes	No (specify label if provided, e.g., &quot;turkish honey&quot;)	NA	No	NA	No	NA	NA	NA	NA	NA	Yes	No (specify label if provided, e.g., &quot;turkish honey&quot;)	NA	No	NA	Yes	NA	NA	NA	NA
37674	3	2018	Iran	NA	Mouse / Mice	NA	NA	NA	NA	NA	NA	NA	NA	NA	NA	NA	NA	NA	NA	NA	NA	NA	NA	Experimental - deliberate disease model	Yes	Prevent	No	NA	NA	NA	NA	NA	NA	NA	NA	NA	NA	NA	NA	NA	NA	NA	NA	NA	NA	NA	NA	NA	NA
37703	3	2018	Morocco	Rat	NA	NA	NA	NA	NA	NA	NA	NA	NA	NA	NA	NA	NA	NA	NA	NA	NA	NA	NA	Experimental - deliberate disease model	Yes	Prevent	No	NA	NA	NA	NA	NA	NA	NA	NA	NA	NA	NA	NA	NA	NA	NA	NA	NA	NA	NA	NA	NA	NA
37723	3	2018	Japan	NA	Mouse / Mice	NA	NA	NA	NA	NA	NA	NA	NA	NA	NA	NA	NA	NA	NA	NA	NA	NA	NA	Experimental - deliberate disease model	Yes	Treat	Yes	4	Yes	No (specify label if provided, e.g., &quot;turkish honey&quot;)	acacia honey	No	NA	No	NA	NA	NA	NA	NA	Yes	No (specify label if provided, e.g., &quot;turkish honey&quot;)	honeydew honey	No	NA	No	NA	NA	NA	NA
37729	3	2018	Iran	Rat	NA	NA	NA	NA	NA	NA	NA	NA	NA	NA	NA	NA	NA	NA	NA	NA	NA	NA	NA	Experimental - deliberate disease model	Yes	Treat	Yes	2	Yes	No (specify label if provided, e.g., &quot;turkish honey&quot;)	NA	No	NA	Yes	Drug	NA	NA	NA	NA	Yes	No (specify label if provided, e.g., &quot;turkish honey&quot;)	NA	No	NA	Yes	NA	Drug	NA	NA
37739	3	2018	Iran	Rat	NA	NA	NA	NA	NA	NA	NA	NA	NA	NA	NA	NA	NA	NA	NA	NA	NA	NA	NA	Experimental - deliberate disease model	Yes	Treat	Yes	2	Yes	No (specify label if provided, e.g., &quot;turkish honey&quot;)	NA	No	NA	No	NA	NA	NA	NA	NA	Yes	No (specify label if provided, e.g., &quot;turkish honey&quot;)	NA	No	NA	Yes	NA	NA	NA	NA
37756	3	2018	Iran	NA	Mouse / Mice	NA	NA	NA	NA	NA	NA	NA	NA	NA	NA	NA	NA	NA	NA	NA	NA	NA	NA	Experimental - deliberate disease model	Yes	Treat	No	NA	NA	NA	NA	NA	NA	NA	NA	NA	NA	NA	NA	NA	NA	NA	NA	NA	NA	NA	NA	NA	NA
37821	3	2018	Turkey	Rat	NA	NA	NA	NA	NA	NA	NA	NA	NA	NA	NA	NA	NA	NA	NA	NA	NA	NA	NA	Experimental - deliberate disease model	Yes	Prevent	Yes	2	Yes	No (specify label if provided, e.g., &quot;turkish honey&quot;)	NA	No	NA	No	NA	NA	NA	NA	NA	Yes	No (specify label if provided, e.g., &quot;turkish honey&quot;)	NA	No	NA	Yes	NA	NA	NA	NA
37879	3	2018	Iran	Rat	NA	NA	NA	NA	NA	NA	NA	NA	NA	NA	NA	NA	NA	NA	NA	NA	NA	NA	NA	Experimental - deliberate disease model	Yes	Prevent	Yes	2	Yes	No (specify label if provided, e.g., &quot;turkish honey&quot;)	NA	No	NA	No	NA	NA	NA	NA	NA	Yes	No (specify label if provided, e.g., &quot;turkish honey&quot;)	NA	No	NA	Yes	NA	NA	NA	NA
37989	3	2017	Iran	Rat	NA	NA	NA	NA	NA	NA	NA	NA	NA	NA	NA	NA	NA	NA	NA	NA	NA	NA	NA	Experimental - deliberate disease model	Yes	Prevent	No	NA	NA	NA	NA	NA	NA	NA	NA	NA	NA	NA	NA	NA	NA	NA	NA	NA	NA	NA	NA	NA	NA
38039	3	2018	Turkey	Rat	NA	NA	NA	NA	NA	NA	NA	NA	NA	NA	NA	NA	NA	NA	NA	NA	NA	NA	NA	Experimental - deliberate disease model	Yes	Prevent	No	NA	NA	NA	NA	NA	NA	NA	NA	NA	NA	NA	NA	NA	NA	NA	NA	NA	NA	NA	NA	NA	NA
38064	3	2018	Pakistan	NA	Mouse / Mice	NA	NA	NA	NA	NA	NA	NA	NA	NA	NA	NA	NA	NA	NA	NA	NA	NA	NA	Experimental - deliberate disease model	Yes	Treat	No	NA	NA	NA	NA	NA	NA	NA	NA	NA	NA	NA	NA	NA	NA	NA	NA	NA	NA	NA	NA	NA	NA
38114	3	2018	Iran	Rat	NA	NA	NA	NA	NA	NA	NA	NA	NA	NA	NA	NA	NA	NA	NA	NA	NA	NA	NA	Experimental - deliberate disease model	Yes	Treat	Yes	3	Yes	No (specify label if provided, e.g., &quot;turkish honey&quot;)	ardebil honey	No	NA	No	NA	NA	NA	NA	NA	Yes	No (specify label if provided, e.g., &quot;turkish honey&quot;)	damavand honey	No	NA	No	NA	NA	NA	NA
38124	3	2018	Malaysia	Rat	NA	NA	NA	NA	NA	NA	NA	NA	NA	NA	NA	NA	NA	NA	NA	NA	NA	NA	NA	Experimental - deliberate disease model	Yes	Prevent	No	NA	NA	NA	NA	NA	NA	NA	NA	NA	NA	NA	NA	NA	NA	NA	NA	NA	NA	NA	NA	NA	NA
38138	3	2018	Malaysia	Rat	NA	NA	NA	NA	NA	NA	NA	NA	NA	NA	NA	NA	NA	NA	NA	NA	NA	NA	NA	Experimental - deliberate disease model	Yes	Prevent	No	NA	NA	NA	NA	NA	NA	NA	NA	NA	NA	NA	NA	NA	NA	NA	NA	NA	NA	NA	NA	NA	NA
38142	3	2018	Indonesia	Rat	NA	NA	NA	NA	NA	NA	NA	NA	NA	NA	NA	NA	NA	NA	NA	NA	NA	NA	NA	Experimental - deliberate disease model	Yes	Treat	No	NA	NA	NA	NA	NA	NA	NA	NA	NA	NA	NA	NA	NA	NA	NA	NA	NA	NA	NA	NA	NA	NA
38152	3	2018	Turkey	Rat	NA	NA	NA	NA	NA	NA	NA	NA	NA	NA	NA	NA	NA	NA	NA	NA	NA	NA	NA	Experimental - deliberate disease model	Yes	Treat	Yes	2	Yes	No (specify label if provided, e.g., &quot;turkish honey&quot;)	mad honey	No	NA	No	NA	NA	NA	NA	NA	Yes	No (specify label if provided, e.g., &quot;turkish honey&quot;)	NA	No	NA	No	NA	NA	NA	NA
38163	3	2018	Chile	NA	NA	NA	NA	NA	NA	NA	NA	NA	NA	NA	NA	NA	NA	NA	NA	NA	NA	Ginea pigs	NA	Experimental - deliberate disease model	Yes	Treat	Yes	2	Yes	No (specify label if provided, e.g., &quot;turkish honey&quot;)	ulmo honey	No	NA	No	NA	NA	NA	NA	NA	Yes	No (specify label if provided, e.g., &quot;turkish honey&quot;)	ulmo honey	No	NA	Yes	NA	NA	NA	NA
38171	3	2018	Iran	Rat	NA	NA	NA	NA	NA	NA	NA	NA	NA	NA	NA	NA	NA	NA	NA	NA	NA	NA	NA	Experimental - deliberate disease model	Yes	Treat	No	NA	NA	NA	NA	NA	NA	NA	NA	NA	NA	NA	NA	NA	NA	NA	NA	NA	NA	NA	NA	NA	NA
38182	3	2018	Egypt	Rat	NA	NA	NA	NA	NA	NA	NA	NA	NA	NA	NA	NA	NA	NA	NA	NA	NA	NA	NA	Experimental - deliberate disease model	Yes	Prevent	Yes	6	No	NA	NA	Yes (specify which derivative it was, e.g., chrysin)	Bacillus subtilis HMNIG-2	No	NA	NA	NA	NA	NA	No	NA	NA	Yes (specify which derivative it was, e.g., chrysin)	Bacillus subtilis HMNIG-2 levan	No	NA	NA	NA	NA
38240	3	2017	Iran	Rat	NA	NA	NA	NA	NA	NA	NA	NA	NA	NA	NA	NA	NA	NA	NA	NA	NA	NA	NA	Experimental - deliberate disease model	Yes	Treat	No	NA	NA	NA	NA	NA	NA	NA	NA	NA	NA	NA	NA	NA	NA	NA	NA	NA	NA	NA	NA	NA	NA
38364	3	2017	Ukraine	Rat	NA	NA	NA	NA	NA	NA	NA	NA	NA	NA	NA	NA	NA	NA	NA	NA	NA	NA	NA	Experimental - deliberate disease model	Yes	Treat	No	NA	NA	NA	NA	NA	NA	NA	NA	NA	NA	NA	NA	NA	NA	NA	NA	NA	NA	NA	NA	NA	NA
38372	3	2017	Iran	Rat	NA	NA	NA	NA	NA	NA	NA	NA	NA	NA	NA	NA	NA	NA	NA	NA	NA	NA	NA	Experimental - deliberate disease model	Yes	Treat	No	NA	NA	NA	NA	NA	NA	NA	NA	NA	NA	NA	NA	NA	NA	NA	NA	NA	NA	NA	NA	NA	NA
38408	3	2017	Egypt	NA	Mouse / Mice	NA	NA	NA	NA	NA	NA	NA	NA	NA	NA	NA	NA	NA	NA	NA	NA	NA	NA	Experimental - deliberate disease model	Yes	Treat	Yes	3	Yes	No (specify label if provided, e.g., &quot;turkish honey&quot;)	clover honey	No	NA	Yes	NA	Other bee products (Specify, e.g., bee venom, propolis, bee pollen, royal jelly, beeswax, bee bread)	bee venom	Other (specify)	nanofibrous dressing (Honey, polyvinyl alcohol, chitosan)	Yes	No (specify label if provided, e.g., &quot;turkish honey&quot;)	clover honey	No	NA	Yes	NA	NA	Other bee products (Specify, e.g., bee venom, propolis, bee pollen, royal jelly, beeswax, bee bread)	propolis
38422	3	2017	Egypt	NA	Mouse / Mice	NA	NA	NA	NA	NA	NA	NA	NA	NA	NA	NA	NA	NA	NA	NA	NA	NA	NA	Experimental - deliberate disease model	Yes	Treat	Yes	2	Yes	No (specify label if provided, e.g., &quot;turkish honey&quot;)	NA	No	NA	No	NA	NA	NA	NA	NA	Yes	No (specify label if provided, e.g., &quot;turkish honey&quot;)	NA	No	NA	Yes	NA	NA	NA	NA
38458	3	2017	Iran	Rat	NA	NA	NA	NA	NA	NA	NA	NA	NA	NA	NA	NA	NA	NA	NA	NA	NA	NA	NA	Experimental - deliberate disease model	Yes	Prevent	No	NA	NA	NA	NA	NA	NA	NA	NA	NA	NA	NA	NA	NA	NA	NA	NA	NA	NA	NA	NA	NA	NA
38518	3	2017	South Korea	NA	Mouse / Mice	NA	NA	NA	NA	NA	NA	NA	NA	NA	NA	NA	NA	NA	NA	NA	NA	NA	NA	Experimental - deliberate disease model	Yes	Treat	No	NA	NA	NA	NA	NA	NA	NA	NA	NA	NA	NA	NA	NA	NA	NA	NA	NA	NA	NA	NA	NA	NA
38540	3	2017	Indonesia	NA	Mouse / Mice	NA	NA	NA	NA	NA	NA	NA	NA	NA	NA	NA	NA	NA	NA	NA	NA	NA	NA	Experimental - deliberate disease model	Yes	Treat	No	NA	NA	NA	NA	NA	NA	NA	NA	NA	NA	NA	NA	NA	NA	NA	NA	NA	NA	NA	NA	NA	NA
38546	3	2017	Egypt	Rat	NA	NA	NA	NA	NA	NA	NA	NA	NA	NA	NA	NA	NA	NA	NA	NA	NA	NA	NA	Experimental - deliberate disease model	Yes	Treat	No	NA	NA	NA	NA	NA	NA	NA	NA	NA	NA	NA	NA	NA	NA	NA	NA	NA	NA	NA	NA	NA	NA
38725	3	2017	Iran	Rat	NA	NA	NA	NA	NA	NA	NA	NA	NA	NA	NA	NA	NA	NA	NA	NA	NA	NA	NA	Experimental - deliberate disease model	Yes	Treat	No	NA	NA	NA	NA	NA	NA	NA	NA	NA	NA	NA	NA	NA	NA	NA	NA	NA	NA	NA	NA	NA	NA
38792	3	2017	Oman	Rat	NA	NA	NA	NA	NA	NA	NA	NA	NA	NA	NA	NA	NA	NA	NA	NA	NA	NA	NA	Experimental - deliberate disease model	Yes	Treat	Yes	2	Yes	No (specify label if provided, e.g., &quot;turkish honey&quot;)	NA	No	NA	No	NA	NA	NA	NA	NA	Yes	No (specify label if provided, e.g., &quot;turkish honey&quot;)	NA	No	NA	Yes	NA	Drug	NA	NA
38800	3	2017	Italy	Rat	NA	NA	NA	NA	NA	NA	NA	NA	NA	NA	NA	NA	NA	NA	NA	NA	NA	NA	NA	Experimental - deliberate disease model	Yes	Treat	No	NA	NA	NA	NA	NA	NA	NA	NA	NA	NA	NA	NA	NA	NA	NA	NA	NA	NA	NA	NA	NA	NA
38809	3	2017	China	Rat	NA	NA	NA	NA	NA	NA	NA	NA	NA	NA	NA	NA	NA	NA	NA	NA	NA	NA	NA	Experimental - deliberate disease model	Yes	Prevent	No	NA	NA	NA	NA	NA	NA	NA	NA	NA	NA	NA	NA	NA	NA	NA	NA	NA	NA	NA	NA	NA	NA
38920	3	2017	Malaysia	Rat	NA	NA	NA	NA	NA	NA	NA	NA	NA	NA	NA	NA	NA	NA	NA	NA	NA	NA	NA	Experimental - deliberate disease model	Yes	Treat	Yes	2	Yes	No (specify label if provided, e.g., &quot;turkish honey&quot;)	manuka honey	No	NA	No	NA	NA	NA	NA	NA	Yes	No (specify label if provided, e.g., &quot;turkish honey&quot;)	tualang honey	No	NA	No	NA	NA	NA	NA
38941	3	2017	Saudi Arabia	Rat	NA	NA	NA	NA	NA	NA	NA	NA	NA	NA	NA	NA	NA	NA	NA	NA	NA	NA	NA	Experimental - deliberate disease model	Yes	Treat	No	NA	NA	NA	NA	NA	NA	NA	NA	NA	NA	NA	NA	NA	NA	NA	NA	NA	NA	NA	NA	NA	NA
38943	3	2017	Malaysia	Rat	NA	NA	NA	NA	NA	NA	NA	NA	NA	NA	NA	NA	NA	NA	NA	NA	NA	NA	NA	Experimental - deliberate disease model	Yes	Treat	Yes	2	Yes	No (specify label if provided, e.g., &quot;turkish honey&quot;)	acacia honey	No	NA	No	NA	NA	NA	NA	NA	Yes	No (specify label if provided, e.g., &quot;turkish honey&quot;)	gelam honey	No	NA	No	NA	NA	NA	NA
38946	3	2017	Japan	NA	Mouse / Mice	NA	NA	NA	NA	NA	NA	NA	NA	NA	NA	NA	NA	NA	NA	NA	NA	NA	NA	Experimental - deliberate disease model	Yes	Treat	Yes	3	Yes	No (specify label if provided, e.g., &quot;turkish honey&quot;)	acacia honey	No	NA	Yes	NA	NA	NA	Other (specify)	hydrocolloid dressing	Yes	No (specify label if provided, e.g., &quot;turkish honey&quot;)	buckwheat flour honey	No	NA	Yes	NA	NA	NA	NA
38951	3	2017	Malaysia	Rat	NA	NA	NA	NA	NA	NA	NA	NA	NA	NA	NA	NA	NA	NA	NA	NA	NA	NA	NA	Experimental - deliberate disease model	Yes	Prevent	No	NA	NA	NA	NA	NA	NA	NA	NA	NA	NA	NA	NA	NA	NA	NA	NA	NA	NA	NA	NA	NA	NA
39008	3	2016	South Korea	Rat	NA	NA	NA	NA	NA	NA	NA	NA	NA	NA	NA	NA	NA	NA	NA	NA	NA	NA	NA	Experimental - deliberate disease model	Yes	Treat	No	NA	NA	NA	NA	NA	NA	NA	NA	NA	NA	NA	NA	NA	NA	NA	NA	NA	NA	NA	NA	NA	NA
39052	3	2016	Egypt	Rat	NA	NA	NA	NA	NA	NA	NA	NA	NA	NA	NA	NA	NA	NA	NA	NA	NA	NA	NA	Experimental - deliberate disease model	Yes	Treat	No	NA	NA	NA	NA	NA	NA	NA	NA	NA	NA	NA	NA	NA	NA	NA	NA	NA	NA	NA	NA	NA	NA
39068	3	2016	Chile	NA	NA	NA	NA	NA	NA	NA	NA	NA	NA	NA	NA	NA	NA	NA	NA	NA	NA	Ginea pigs	NA	Experimental - deliberate disease model	Yes	Treat	Yes	2	Yes	No (specify label if provided, e.g., &quot;turkish honey&quot;)	ulmo honey	No	NA	No	NA	NA	NA	NA	NA	Yes	No (specify label if provided, e.g., &quot;turkish honey&quot;)	ulmo honey	No	NA	Yes	NA	NA	NA	NA
39133	3	2016	Iran	Rat	NA	NA	NA	NA	NA	NA	NA	NA	NA	NA	NA	NA	NA	NA	NA	NA	NA	NA	NA	Experimental - deliberate disease model	Yes	Treat	No	NA	NA	NA	NA	NA	NA	NA	NA	NA	NA	NA	NA	NA	NA	NA	NA	NA	NA	NA	NA	NA	NA
39173	3	2016	Egypt	Rat	NA	NA	NA	NA	NA	NA	NA	NA	NA	NA	NA	NA	NA	NA	NA	NA	NA	NA	NA	Experimental - deliberate disease model	Yes	Prevent	No	NA	NA	NA	NA	NA	NA	NA	NA	NA	NA	NA	NA	NA	NA	NA	NA	NA	NA	NA	NA	NA	NA
39276	3	2016	India	Rat	NA	NA	NA	NA	NA	NA	NA	NA	NA	NA	NA	NA	NA	NA	NA	NA	NA	NA	NA	Experimental - deliberate disease model	Yes	Treat	No	NA	NA	NA	NA	NA	NA	NA	NA	NA	NA	NA	NA	NA	NA	NA	NA	NA	NA	NA	NA	NA	NA
39320	3	2016	Iran	Rat	NA	NA	NA	NA	NA	NA	NA	NA	NA	NA	NA	NA	NA	NA	NA	NA	NA	NA	NA	Experimental - deliberate disease model	Yes	Prevent	Yes	3	Yes	No (specify label if provided, e.g., &quot;turkish honey&quot;)	acacia honey	No	NA	No	NA	NA	NA	NA	NA	Yes	No (specify label if provided, e.g., &quot;turkish honey&quot;)	strabillus honey	No	NA	No	NA	NA	NA	NA
39366	3	2015	USA	NA	NA	Rabbit	NA	NA	NA	NA	NA	NA	NA	NA	NA	NA	NA	NA	NA	NA	NA	NA	NA	Experimental - deliberate disease model	Yes	Treat	No	NA	NA	NA	NA	NA	NA	NA	NA	NA	NA	NA	NA	NA	NA	NA	NA	NA	NA	NA	NA	NA	NA
39368	3	2016	China	NA	Mouse / Mice	NA	NA	NA	NA	NA	NA	NA	NA	NA	NA	NA	NA	NA	NA	NA	NA	NA	NA	Experimental - deliberate disease model	Yes	Prevent	Yes	3	Yes	No (specify label if provided, e.g., &quot;turkish honey&quot;)	NA	No	NA	Yes	NA	NA	NA	Other (specify)	chrysanthemum tea	Yes	No (specify label if provided, e.g., &quot;turkish honey&quot;)	NA	No	NA	Yes	NA	NA	NA	NA
39370	3	2016	Nigeria	Rat	NA	NA	NA	NA	NA	NA	NA	NA	NA	NA	NA	NA	NA	NA	NA	NA	NA	NA	NA	Experimental - deliberate disease model	Yes	Treat	No	NA	NA	NA	NA	NA	NA	NA	NA	NA	NA	NA	NA	NA	NA	NA	NA	NA	NA	NA	NA	NA	NA
39372	3	2016	Iran	Rat	NA	NA	NA	NA	NA	NA	NA	NA	NA	NA	NA	NA	NA	NA	NA	NA	NA	NA	NA	Experimental - deliberate disease model	Yes	Treat	No	NA	NA	NA	NA	NA	NA	NA	NA	NA	NA	NA	NA	NA	NA	NA	NA	NA	NA	NA	NA	NA	NA
39420	3	2016	Nigeria	Rat	NA	NA	NA	NA	NA	NA	NA	NA	NA	NA	NA	NA	NA	NA	NA	NA	NA	NA	NA	Experimental - deliberate disease model	Yes	Prevent	No	NA	NA	NA	NA	NA	NA	NA	NA	NA	NA	NA	NA	NA	NA	NA	NA	NA	NA	NA	NA	NA	NA
39428	3	2016	Malaysia	Rat	NA	NA	NA	NA	NA	NA	NA	NA	NA	NA	NA	NA	NA	NA	NA	NA	NA	NA	NA	Experimental - deliberate disease model	Yes	Treat	No	NA	NA	NA	NA	NA	NA	NA	NA	NA	NA	NA	NA	NA	NA	NA	NA	NA	NA	NA	NA	NA	NA
39459	3	2016	Iran	Rat	NA	NA	NA	NA	NA	NA	NA	NA	NA	NA	NA	NA	NA	NA	NA	NA	NA	NA	NA	Experimental - deliberate disease model	Yes	Treat	Yes	2	Yes	No (specify label if provided, e.g., &quot;turkish honey&quot;)	NA	No	NA	No	NA	NA	NA	NA	NA	Yes	No (specify label if provided, e.g., &quot;turkish honey&quot;)	NA	No	NA	Yes	NA	NA	Other bee products (Specify, e.g., bee venom, propolis, bee pollen, royal jelly, beeswax, bee bread)	propolis
39484	3	2016	Iran	Rat	NA	NA	NA	NA	NA	NA	NA	NA	NA	NA	NA	NA	NA	NA	NA	NA	NA	NA	NA	Experimental - deliberate disease model	Yes	Treat	No	NA	NA	NA	NA	NA	NA	NA	NA	NA	NA	NA	NA	NA	NA	NA	NA	NA	NA	NA	NA	NA	NA
39507	3	2016	Egypt	Rat	NA	NA	NA	NA	NA	NA	NA	NA	NA	NA	NA	NA	NA	NA	NA	NA	NA	NA	NA	Experimental - deliberate disease model	Yes	Treat	No	NA	NA	NA	NA	NA	NA	NA	NA	NA	NA	NA	NA	NA	NA	NA	NA	NA	NA	NA	NA	NA	NA
39529	3	2016	Bangladesh	Rat	NA	NA	NA	NA	NA	NA	NA	NA	NA	NA	NA	NA	NA	NA	NA	NA	NA	NA	NA	Experimental - deliberate disease model	Yes	Prevent	No	NA	NA	NA	NA	NA	NA	NA	NA	NA	NA	NA	NA	NA	NA	NA	NA	NA	NA	NA	NA	NA	NA
39534	3	2016	Malaysia	Rat	NA	NA	NA	NA	NA	NA	NA	NA	NA	NA	NA	NA	NA	NA	NA	NA	NA	NA	NA	Experimental - deliberate disease model	Yes	Prevent	No	NA	NA	NA	NA	NA	NA	NA	NA	NA	NA	NA	NA	NA	NA	NA	NA	NA	NA	NA	NA	NA	NA
39552	3	2016	Saudi Arabia	Rat	NA	NA	NA	NA	NA	NA	NA	NA	NA	NA	NA	NA	NA	NA	NA	NA	NA	NA	NA	Experimental - deliberate disease model	Yes	Prevent	No	NA	NA	NA	NA	NA	NA	NA	NA	NA	NA	NA	NA	NA	NA	NA	NA	NA	NA	NA	NA	NA	NA
39553	3	2016	Turkey	Rat	NA	NA	NA	NA	NA	NA	NA	NA	NA	NA	NA	NA	NA	NA	NA	NA	NA	NA	NA	Experimental - deliberate disease model	Yes	Treat	No	NA	NA	NA	NA	NA	NA	NA	NA	NA	NA	NA	NA	NA	NA	NA	NA	NA	NA	NA	NA	NA	NA
39568	3	2016	Morocco	NA	NA	Rabbit	NA	NA	NA	NA	NA	NA	NA	NA	NA	NA	NA	NA	NA	NA	NA	NA	NA	Experimental - deliberate disease model	Yes	Prevent	No	NA	NA	NA	NA	NA	NA	NA	NA	NA	NA	NA	NA	NA	NA	NA	NA	NA	NA	NA	NA	NA	NA
39688	3	2015	Bangladesh	Rat	NA	NA	NA	NA	NA	NA	NA	NA	NA	NA	NA	NA	NA	NA	NA	NA	NA	NA	NA	Experimental - deliberate disease model	Yes	Prevent	No	NA	NA	NA	NA	NA	NA	NA	NA	NA	NA	NA	NA	NA	NA	NA	NA	NA	NA	NA	NA	NA	NA
39750	3	2015	Bangladesh	Rat	NA	NA	NA	NA	NA	NA	NA	NA	NA	NA	NA	NA	NA	NA	NA	NA	NA	NA	NA	Experimental - deliberate disease model	Yes	Treat	No	NA	NA	NA	NA	NA	NA	NA	NA	NA	NA	NA	NA	NA	NA	NA	NA	NA	NA	NA	NA	NA	NA
39777	3	2015	Iran	Rat	NA	NA	NA	NA	NA	NA	NA	NA	NA	NA	NA	NA	NA	NA	NA	NA	NA	NA	NA	Experimental - deliberate disease model	Yes	Treat	No	NA	NA	NA	NA	NA	NA	NA	NA	NA	NA	NA	NA	NA	NA	NA	NA	NA	NA	NA	NA	NA	NA
39781	3	2015	USA	NA	Mouse / Mice	NA	NA	NA	NA	NA	NA	NA	NA	NA	NA	NA	NA	NA	NA	NA	NA	NA	NA	Experimental - deliberate disease model	Yes	Prevent	No	NA	NA	NA	NA	NA	NA	NA	NA	NA	NA	NA	NA	NA	NA	NA	NA	NA	NA	NA	NA	NA	NA
39803	3	2015	Iran	NA	Mouse / Mice	NA	NA	NA	NA	NA	NA	NA	NA	NA	NA	NA	NA	NA	NA	NA	NA	NA	NA	Experimental - deliberate disease model	Yes	Treat	No	NA	NA	NA	NA	NA	NA	NA	NA	NA	NA	NA	NA	NA	NA	NA	NA	NA	NA	NA	NA	NA	NA
39811	3	2015	China	NA	Mouse / Mice	NA	NA	NA	NA	NA	NA	NA	NA	NA	NA	NA	NA	NA	NA	NA	NA	NA	NA	Experimental - deliberate disease model	Yes	Prevent	No	NA	NA	NA	NA	NA	NA	NA	NA	NA	NA	NA	NA	NA	NA	NA	NA	NA	NA	NA	NA	NA	NA
39868	3	2015	Saudi Arabia	Rat	NA	NA	NA	NA	NA	NA	NA	NA	NA	NA	NA	NA	NA	NA	NA	NA	NA	NA	NA	Experimental - deliberate disease model	Yes	Prevent	No	NA	NA	NA	NA	NA	NA	NA	NA	NA	NA	NA	NA	NA	NA	NA	NA	NA	NA	NA	NA	NA	NA
39974	3	2015	Malaysia	Rat	NA	NA	NA	NA	NA	NA	NA	NA	NA	NA	NA	NA	NA	NA	NA	NA	NA	NA	NA	Experimental - deliberate disease model	Yes	Prevent	No	NA	NA	NA	NA	NA	NA	NA	NA	NA	NA	NA	NA	NA	NA	NA	NA	NA	NA	NA	NA	NA	NA
40085	3	2015	Indonesia	Rat	NA	NA	NA	NA	NA	NA	NA	NA	NA	NA	NA	NA	NA	NA	NA	NA	NA	NA	NA	Experimental - deliberate disease model	Yes	Treat	No	NA	NA	NA	NA	NA	NA	NA	NA	NA	NA	NA	NA	NA	NA	NA	NA	NA	NA	NA	NA	NA	NA
40089	3	2015	Malaysia	Rat	NA	NA	NA	NA	NA	NA	NA	NA	NA	NA	NA	NA	NA	NA	NA	NA	NA	NA	NA	Experimental - deliberate disease model	Yes	Prevent	No	NA	NA	NA	NA	NA	NA	NA	NA	NA	NA	NA	NA	NA	NA	NA	NA	NA	NA	NA	NA	NA	NA
40095	3	2015	India	Rat	NA	NA	NA	NA	NA	NA	NA	NA	NA	NA	NA	NA	NA	NA	NA	NA	NA	NA	NA	Experimental - deliberate disease model	Yes	Treat	No	NA	NA	NA	NA	NA	NA	NA	NA	NA	NA	NA	NA	NA	NA	NA	NA	NA	NA	NA	NA	NA	NA
40101	3	2015	China	NA	Mouse / Mice	NA	NA	NA	NA	NA	NA	NA	NA	NA	NA	NA	NA	NA	NA	NA	NA	NA	NA	Experimental - deliberate disease model	Yes	Prevent	No	NA	NA	NA	NA	NA	NA	NA	NA	NA	NA	NA	NA	NA	NA	NA	NA	NA	NA	NA	NA	NA	NA
40121	3	2015	Turkey	Rat	NA	NA	NA	NA	NA	NA	NA	NA	NA	NA	NA	NA	NA	NA	NA	NA	NA	NA	NA	Experimental - deliberate disease model	Yes	Treat	Yes	2	Yes	No (specify label if provided, e.g., &quot;turkish honey&quot;)	chestnut honey	No	NA	Yes	Drug	NA	NA	NA	NA	Yes	No (specify label if provided, e.g., &quot;turkish honey&quot;)	chestnut honey	No	NA	Yes	NA	Drug	NA	NA
40125	3	2015	China	NA	Mouse / Mice	NA	NA	NA	NA	NA	NA	NA	NA	NA	NA	NA	NA	NA	NA	NA	NA	NA	NA	Experimental - deliberate disease model	Yes	Prevent	No	NA	NA	NA	NA	NA	NA	NA	NA	NA	NA	NA	NA	NA	NA	NA	NA	NA	NA	NA	NA	NA	NA
40131	3	2015	Japan	NA	Mouse / Mice	NA	NA	NA	NA	NA	NA	NA	NA	NA	NA	NA	NA	NA	NA	NA	NA	NA	NA	Experimental - deliberate disease model	Yes	Treat	Yes	3	Yes	No (specify label if provided, e.g., &quot;turkish honey&quot;)	acacia honey	No	NA	Yes	NA	NA	NA	Other (specify)	hydrocolloid dressing	Yes	No (specify label if provided, e.g., &quot;turkish honey&quot;)	chinese milk vetch honey	No	NA	Yes	NA	NA	NA	NA
40134	3	2015	Bangladesh	Rat	NA	NA	NA	NA	NA	NA	NA	NA	NA	NA	NA	NA	NA	NA	NA	NA	NA	NA	NA	Experimental - deliberate disease model	Yes	Prevent	No	NA	NA	NA	NA	NA	NA	NA	NA	NA	NA	NA	NA	NA	NA	NA	NA	NA	NA	NA	NA	NA	NA
40213	3	2014	Malaysia	Rat	NA	NA	NA	NA	NA	NA	NA	NA	NA	NA	NA	NA	NA	NA	NA	NA	NA	NA	NA	Experimental - deliberate disease model	Yes	Prevent	No	NA	NA	NA	NA	NA	NA	NA	NA	NA	NA	NA	NA	NA	NA	NA	NA	NA	NA	NA	NA	NA	NA
40238	3	2014	Malaysia	Rat	NA	NA	NA	NA	NA	NA	NA	NA	NA	NA	NA	NA	NA	NA	NA	NA	NA	NA	NA	Experimental - deliberate disease model	Yes	Prevent	No	NA	NA	NA	NA	NA	NA	NA	NA	NA	NA	NA	NA	NA	NA	NA	NA	NA	NA	NA	NA	NA	NA
40310	3	2014	Japan	Rat	NA	NA	NA	NA	NA	NA	NA	NA	NA	NA	NA	NA	NA	NA	NA	NA	NA	NA	NA	Experimental - deliberate disease model	Yes	Prevent	No	NA	NA	NA	NA	NA	NA	NA	NA	NA	NA	NA	NA	NA	NA	NA	NA	NA	NA	NA	NA	NA	NA
40326	3	2014	Romania	Rat	NA	NA	NA	NA	NA	NA	NA	NA	NA	NA	NA	NA	NA	NA	NA	NA	NA	NA	NA	Experimental - deliberate disease model	Yes	Treat	Yes	2	Yes	No (specify label if provided, e.g., &quot;turkish honey&quot;)	NA	No	NA	Yes	NA	Other bee products (Specify, e.g., bee venom, propolis, bee pollen, royal jelly, beeswax, bee bread)	propolis, Apilarnil, pollen granules	NA	NA	Yes	No (specify label if provided, e.g., &quot;turkish honey&quot;)	NA	No	NA	Yes	NA	NA	Other bee products (Specify, e.g., bee venom, propolis, bee pollen, royal jelly, beeswax, bee bread)	propolis, Apilarnil, pollen granules, royal jelly
40366	3	2014	Iran	Rat	NA	NA	NA	NA	NA	NA	NA	NA	NA	NA	NA	NA	NA	NA	NA	NA	NA	NA	NA	Experimental - deliberate disease model	Yes	Treat	No	NA	NA	NA	NA	NA	NA	NA	NA	NA	NA	NA	NA	NA	NA	NA	NA	NA	NA	NA	NA	NA	NA
40373	3	2014	United Kingdom	NA	NA	Rabbit	NA	NA	NA	NA	NA	NA	NA	NA	NA	NA	NA	NA	NA	NA	NA	NA	NA	Experimental - deliberate disease model	Yes	Treat	No	NA	NA	NA	NA	NA	NA	NA	NA	NA	NA	NA	NA	NA	NA	NA	NA	NA	NA	NA	NA	NA	NA
40415	3	2014	India	Rat	NA	NA	NA	NA	NA	NA	NA	NA	NA	NA	NA	NA	NA	NA	NA	NA	NA	NA	NA	Experimental - deliberate disease model	Yes	Treat	No	NA	NA	NA	NA	NA	NA	NA	NA	NA	NA	NA	NA	NA	NA	NA	NA	NA	NA	NA	NA	NA	NA
40496	3	2014	China	NA	Mouse / Mice	NA	NA	NA	NA	NA	NA	NA	NA	NA	NA	NA	NA	NA	NA	NA	NA	NA	NA	Experimental - deliberate disease model	Yes	Prevent	No	NA	NA	NA	NA	NA	NA	NA	NA	NA	NA	NA	NA	NA	NA	NA	NA	NA	NA	NA	NA	NA	NA
40534	3	2014	South Korea	NA	Mouse / Mice	NA	NA	NA	NA	NA	NA	NA	NA	NA	NA	NA	NA	NA	NA	NA	NA	NA	NA	Experimental - deliberate disease model	Yes	Treat	No	NA	NA	NA	NA	NA	NA	NA	NA	NA	NA	NA	NA	NA	NA	NA	NA	NA	NA	NA	NA	NA	NA
40561	3	2014	Australia	NA	NA	NA	NA	NA	NA	NA	NA	NA	NA	NA	NA	NA	NA	NA	Sheep	NA	NA	NA	NA	Experimental - deliberate disease model	Yes	Treat	No	NA	NA	NA	NA	NA	NA	NA	NA	NA	NA	NA	NA	NA	NA	NA	NA	NA	NA	NA	NA	NA	NA
40644	3	2014	Bangladesh	Rat	NA	NA	NA	NA	NA	NA	NA	NA	NA	NA	NA	NA	NA	NA	NA	NA	NA	NA	NA	Experimental - deliberate disease model	Yes	Prevent	No	NA	NA	NA	NA	NA	NA	NA	NA	NA	NA	NA	NA	NA	NA	NA	NA	NA	NA	NA	NA	NA	NA
40648	3	2014	Romania	Rat	NA	NA	NA	NA	NA	NA	NA	NA	NA	NA	NA	NA	NA	NA	NA	NA	NA	NA	NA	Experimental - deliberate disease model	Yes	Prevent	Yes	2	Yes	No (specify label if provided, e.g., &quot;turkish honey&quot;)	NA	No	NA	Yes	NA	Other bee products (Specify, e.g., bee venom, propolis, bee pollen, royal jelly, beeswax, bee bread)	proapilarnil, pollen, propolis	NA	NA	Yes	No (specify label if provided, e.g., &quot;turkish honey&quot;)	NA	No	NA	Yes	NA	NA	Other bee products (Specify, e.g., bee venom, propolis, bee pollen, royal jelly, beeswax, bee bread)	proapilarnil, pollen, propolis, royal jelly
40679	3	2014	Iran	NA	Mouse / Mice	NA	NA	NA	NA	NA	NA	NA	NA	NA	NA	NA	NA	NA	NA	NA	NA	NA	NA	Experimental - deliberate disease model	Yes	Prevent	Yes	4	Yes	No (specify label if provided, e.g., &quot;turkish honey&quot;)	astragalus membranaceus honey	No	NA	No	NA	NA	NA	NA	NA	Yes	No (specify label if provided, e.g., &quot;turkish honey&quot;)	mentha longifolia, glycyrrihza glabra honey	No	NA	No	NA	NA	NA	NA
40685	3	2014	Malaysia	Rat	NA	NA	NA	NA	NA	NA	NA	NA	NA	NA	NA	NA	NA	NA	NA	NA	NA	NA	NA	Experimental - deliberate disease model	Yes	Treat	Yes	2	Yes	No (specify label if provided, e.g., &quot;turkish honey&quot;)	gelam honey	No	NA	No	NA	NA	NA	NA	NA	Yes	No (specify label if provided, e.g., &quot;turkish honey&quot;)	gelam honey	No	NA	Yes	NA	NA	NA	NA
40688	3	2014	Iran	Rat	NA	NA	NA	NA	NA	NA	NA	NA	NA	NA	NA	NA	NA	NA	NA	NA	NA	NA	NA	Experimental - deliberate disease model	Yes	Treat	Yes	2	Yes	No (specify label if provided, e.g., &quot;turkish honey&quot;)	NA	No	NA	No	NA	NA	NA	NA	NA	Yes	No (specify label if provided, e.g., &quot;turkish honey&quot;)	NA	No	NA	Yes	NA	Drug	NA	NA
40691	3	2014	Malaysia	Rat	NA	NA	NA	NA	NA	NA	NA	NA	NA	NA	NA	NA	NA	NA	NA	NA	NA	NA	NA	Experimental - deliberate disease model	Yes	Treat	No	NA	NA	NA	NA	NA	NA	NA	NA	NA	NA	NA	NA	NA	NA	NA	NA	NA	NA	NA	NA	NA	NA
40698	3	2014	Malaysia	Rat	NA	NA	NA	NA	NA	NA	NA	NA	NA	NA	NA	NA	NA	NA	NA	NA	NA	NA	NA	Experimental - deliberate disease model	Yes	Treat	No	NA	NA	NA	NA	NA	NA	NA	NA	NA	NA	NA	NA	NA	NA	NA	NA	NA	NA	NA	NA	NA	NA
40707	3	2014	Malaysia	Rat	NA	NA	NA	NA	NA	NA	NA	NA	NA	NA	NA	NA	NA	NA	NA	NA	NA	NA	NA	Experimental - deliberate disease model	Yes	Treat	No	NA	NA	NA	NA	NA	NA	NA	NA	NA	NA	NA	NA	NA	NA	NA	NA	NA	NA	NA	NA	NA	NA
40732	3	2014	South Korea	NA	Mouse / Mice	NA	NA	NA	NA	NA	NA	NA	NA	NA	NA	NA	NA	NA	NA	NA	NA	NA	NA	Experimental - deliberate disease model	Yes	Treat	No	NA	NA	NA	NA	NA	NA	NA	NA	NA	NA	NA	NA	NA	NA	NA	NA	NA	NA	NA	NA	NA	NA
40761	3	2013	Iran	Rat	NA	NA	NA	NA	NA	NA	NA	NA	NA	NA	NA	NA	NA	NA	NA	NA	NA	NA	NA	Experimental - deliberate disease model	Yes	Treat	Yes	2	Yes	No (specify label if provided, e.g., &quot;turkish honey&quot;)	NA	No	NA	No	NA	NA	NA	NA	NA	Yes	No (specify label if provided, e.g., &quot;turkish honey&quot;)	NA	No	NA	Yes	NA	Drug	NA	NA
40790	3	2013	Poland	NA	NA	NA	Pigs	NA	NA	NA	NA	NA	NA	NA	NA	NA	NA	NA	NA	NA	NA	NA	NA	Experimental - deliberate disease model	Yes	Treat	No	NA	NA	NA	NA	NA	NA	NA	NA	NA	NA	NA	NA	NA	NA	NA	NA	NA	NA	NA	NA	NA	NA
40869	3	2013	Malaysia	Rat	NA	NA	NA	NA	NA	NA	NA	NA	NA	NA	NA	NA	NA	NA	NA	NA	NA	NA	NA	Experimental - deliberate disease model	Yes	Prevent	No	NA	NA	NA	NA	NA	NA	NA	NA	NA	NA	NA	NA	NA	NA	NA	NA	NA	NA	NA	NA	NA	NA
40878	3	2013	Malaysia	Rat	NA	NA	NA	NA	NA	NA	NA	NA	NA	NA	NA	NA	NA	NA	NA	NA	NA	NA	NA	Experimental - deliberate disease model	Yes	Prevent	No	NA	NA	NA	NA	NA	NA	NA	NA	NA	NA	NA	NA	NA	NA	NA	NA	NA	NA	NA	NA	NA	NA
40899	3	2013	Malaysia	Rat	NA	NA	NA	NA	NA	NA	NA	NA	NA	NA	NA	NA	NA	NA	NA	NA	NA	NA	NA	Experimental - deliberate disease model	Yes	Prevent	No	NA	NA	NA	NA	NA	NA	NA	NA	NA	NA	NA	NA	NA	NA	NA	NA	NA	NA	NA	NA	NA	NA
40901	3	2013	Iran	Rat	NA	NA	NA	NA	NA	NA	NA	NA	NA	NA	NA	NA	NA	NA	NA	NA	NA	NA	NA	Experimental - deliberate disease model	Yes	Prevent	No	NA	NA	NA	NA	NA	NA	NA	NA	NA	NA	NA	NA	NA	NA	NA	NA	NA	NA	NA	NA	NA	NA
40989	3	2013	Palestine	NA	NA	Rabbit	NA	NA	NA	NA	NA	NA	NA	NA	NA	NA	NA	NA	NA	NA	NA	NA	NA	Experimental - deliberate disease model	Yes	Prevent	No	NA	NA	NA	NA	NA	NA	NA	NA	NA	NA	NA	NA	NA	NA	NA	NA	NA	NA	NA	NA	NA	NA
40992	3	2012	Malaysia	Rat	NA	NA	NA	NA	NA	NA	NA	NA	NA	NA	NA	NA	NA	NA	NA	NA	NA	NA	NA	Experimental - deliberate disease model	Yes	Prevent	No	NA	NA	NA	NA	NA	NA	NA	NA	NA	NA	NA	NA	NA	NA	NA	NA	NA	NA	NA	NA	NA	NA
41045	3	2013	United Arab Emirates	NA	Mouse / Mice	NA	NA	NA	NA	NA	NA	NA	NA	NA	NA	NA	NA	NA	NA	NA	NA	NA	NA	Experimental - deliberate disease model	Yes	Treat	Yes	2	Yes	Yes (specify product name)	Manuka honey (UMF 10+, Honeyland NZ Ltd, New Zealand)	No	NA	No	NA	NA	NA	NA	NA	Yes	Yes (specify product name)	Manuka honey (UMF 10+, Honeyland NZ Ltd, New Zealand)	No	NA	Yes	NA	Drug	NA	NA
41078	3	2013	Turkey	Rat	NA	NA	NA	NA	NA	NA	NA	NA	NA	NA	NA	NA	NA	NA	NA	NA	NA	NA	NA	Experimental - deliberate disease model	Yes	Prevent	No	NA	NA	NA	NA	NA	NA	NA	NA	NA	NA	NA	NA	NA	NA	NA	NA	NA	NA	NA	NA	NA	NA
41083	3	2013	Japan	NA	Mouse / Mice	NA	NA	NA	NA	NA	NA	NA	NA	NA	NA	NA	NA	NA	NA	NA	NA	NA	NA	Experimental - deliberate disease model	Yes	Treat	Yes	2	Yes	No (specify label if provided, e.g., &quot;turkish honey&quot;)	acacia honey	No	NA	No	NA	NA	NA	NA	NA	Yes	No (specify label if provided, e.g., &quot;turkish honey&quot;)	manuka honey	No	NA	No	NA	NA	NA	NA
41088	3	2013	Nigeria	NA	NA	Rabbit	NA	NA	NA	NA	NA	NA	NA	NA	NA	NA	NA	NA	NA	NA	NA	NA	NA	Experimental - deliberate disease model	Yes	Treat	Yes	2	Yes	No (specify label if provided, e.g., &quot;turkish honey&quot;)	NA	No	NA	No	NA	NA	NA	NA	NA	Yes	No (specify label if provided, e.g., &quot;turkish honey&quot;)	NA	No	NA	Yes	NA	NA	NA	NA
41089	3	2013	Malaysia	Rat	NA	NA	NA	NA	NA	NA	NA	NA	NA	NA	NA	NA	NA	NA	NA	NA	NA	NA	NA	Experimental - deliberate disease model	Yes	Treat	No	NA	NA	NA	NA	NA	NA	NA	NA	NA	NA	NA	NA	NA	NA	NA	NA	NA	NA	NA	NA	NA	NA
41094	3	2013	Saudi Arabia	Rat	NA	NA	NA	NA	NA	NA	NA	NA	NA	NA	NA	NA	NA	NA	NA	NA	NA	NA	NA	Experimental - deliberate disease model	Yes	Prevent	No	NA	NA	NA	NA	NA	NA	NA	NA	NA	NA	NA	NA	NA	NA	NA	NA	NA	NA	NA	NA	NA	NA
41098	3	2013	Saudi Arabia	Rat	NA	NA	NA	NA	NA	NA	NA	NA	NA	NA	NA	NA	NA	NA	NA	NA	NA	NA	NA	Experimental - deliberate disease model	Yes	Prevent	No	NA	NA	NA	NA	NA	NA	NA	NA	NA	NA	NA	NA	NA	NA	NA	NA	NA	NA	NA	NA	NA	NA
41102	3	2013	Cuba	Rat	NA	NA	NA	NA	NA	NA	NA	NA	NA	NA	NA	NA	NA	NA	NA	NA	NA	NA	NA	Experimental - deliberate disease model	Yes	Treat	No	NA	NA	NA	NA	NA	NA	NA	NA	NA	NA	NA	NA	NA	NA	NA	NA	NA	NA	NA	NA	NA	NA
41109	3	2013	Saudi Arabia	Rat	NA	NA	NA	NA	NA	NA	NA	NA	NA	NA	NA	NA	NA	NA	NA	NA	NA	NA	NA	Experimental - deliberate disease model	Yes	Prevent	No	NA	NA	NA	NA	NA	NA	NA	NA	NA	NA	NA	NA	NA	NA	NA	NA	NA	NA	NA	NA	NA	NA
41141	3	2013	Saudi Arabia	Rat	NA	NA	NA	NA	NA	NA	NA	NA	NA	NA	NA	NA	NA	NA	NA	NA	NA	NA	NA	Experimental - deliberate disease model	Yes	Prevent	No	NA	NA	NA	NA	NA	NA	NA	NA	NA	NA	NA	NA	NA	NA	NA	NA	NA	NA	NA	NA	NA	NA
41188	3	2012	Egypt	Rat	NA	NA	NA	NA	NA	NA	NA	NA	NA	NA	NA	NA	NA	NA	NA	NA	NA	NA	NA	Experimental - deliberate disease model	Yes	Prevent	No	NA	NA	NA	NA	NA	NA	NA	NA	NA	NA	NA	NA	NA	NA	NA	NA	NA	NA	NA	NA	NA	NA
41262	3	2012	Malaysia	Rat	NA	NA	NA	NA	NA	NA	NA	NA	NA	NA	NA	NA	NA	NA	NA	NA	NA	NA	NA	Experimental - deliberate disease model	Yes	Treat	No	NA	NA	NA	NA	NA	NA	NA	NA	NA	NA	NA	NA	NA	NA	NA	NA	NA	NA	NA	NA	NA	NA
41350	3	2011	New Zealand	NA	Mouse / Mice	NA	NA	NA	NA	NA	NA	NA	NA	NA	NA	NA	NA	NA	NA	NA	NA	NA	NA	Experimental - deliberate disease model	Yes	Treat	Yes	4	Yes	No (specify label if provided, e.g., &quot;turkish honey&quot;)	clover honey	No	NA	No	NA	NA	NA	NA	NA	Yes	No (specify label if provided, e.g., &quot;turkish honey&quot;)	kanuka honey	No	NA	No	NA	NA	NA	NA
41375	3	2012	Malaysia	NA	NA	Rabbit	NA	NA	NA	NA	NA	NA	NA	NA	NA	NA	NA	NA	NA	NA	NA	NA	NA	Experimental - deliberate disease model	Yes	Prevent	No	NA	NA	NA	NA	NA	NA	NA	NA	NA	NA	NA	NA	NA	NA	NA	NA	NA	NA	NA	NA	NA	NA
41422	3	2012	Japan	NA	Mouse / Mice	NA	NA	NA	NA	NA	NA	NA	NA	NA	NA	NA	NA	NA	NA	NA	NA	NA	NA	Experimental - deliberate disease model	Yes	Treat	Yes	2	Yes	No (specify label if provided, e.g., &quot;turkish honey&quot;)	indonesian honey	No	NA	No	NA	NA	NA	NA	NA	Yes	No (specify label if provided, e.g., &quot;turkish honey&quot;)	manuka honey	No	NA	No	NA	NA	NA	NA
41504	3	2012	South Korea	NA	Mouse / Mice	NA	NA	NA	NA	NA	NA	NA	NA	NA	NA	NA	NA	NA	NA	NA	NA	NA	NA	Experimental - deliberate disease model	Yes	Treat	No	NA	NA	NA	NA	NA	NA	NA	NA	NA	NA	NA	NA	NA	NA	NA	NA	NA	NA	NA	NA	NA	NA
41527	3	2012	Egypt	Rat	NA	NA	NA	NA	NA	NA	NA	NA	NA	NA	NA	NA	NA	NA	NA	NA	NA	NA	NA	Experimental - deliberate disease model	Yes	Treat	No	NA	NA	NA	NA	NA	NA	NA	NA	NA	NA	NA	NA	NA	NA	NA	NA	NA	NA	NA	NA	NA	NA
41558	3	2012	Malaysia	Rat	NA	NA	NA	NA	NA	NA	NA	NA	NA	NA	NA	NA	NA	NA	NA	NA	NA	NA	NA	Experimental - deliberate disease model	Yes	Prevent	No	NA	NA	NA	NA	NA	NA	NA	NA	NA	NA	NA	NA	NA	NA	NA	NA	NA	NA	NA	NA	NA	NA
41572	3	2012	Turkey	Rat	NA	NA	NA	NA	NA	NA	NA	NA	NA	NA	NA	NA	NA	NA	NA	NA	NA	NA	NA	Experimental - deliberate disease model	Yes	Treat	No	NA	NA	NA	NA	NA	NA	NA	NA	NA	NA	NA	NA	NA	NA	NA	NA	NA	NA	NA	NA	NA	NA
41578	3	2012	Malaysia	Rat	NA	NA	NA	NA	NA	NA	NA	NA	NA	NA	NA	NA	NA	NA	NA	NA	NA	NA	NA	Experimental - deliberate disease model	Yes	Treat	No	NA	NA	NA	NA	NA	NA	NA	NA	NA	NA	NA	NA	NA	NA	NA	NA	NA	NA	NA	NA	NA	NA
41589	3	2012	Malaysia	Rat	NA	NA	NA	NA	NA	NA	NA	NA	NA	NA	NA	NA	NA	NA	NA	NA	NA	NA	NA	Experimental - deliberate disease model	Yes	Treat	No	NA	NA	NA	NA	NA	NA	NA	NA	NA	NA	NA	NA	NA	NA	NA	NA	NA	NA	NA	NA	NA	NA
41670	3	2011	Malaysia	Rat	NA	NA	NA	NA	NA	NA	NA	NA	NA	NA	NA	NA	NA	NA	NA	NA	NA	NA	NA	Experimental - deliberate disease model	Yes	Treat	No	NA	NA	NA	NA	NA	NA	NA	NA	NA	NA	NA	NA	NA	NA	NA	NA	NA	NA	NA	NA	NA	NA
41687	3	2011	Iran	Rat	NA	NA	NA	NA	NA	NA	NA	NA	NA	NA	NA	NA	NA	NA	NA	NA	NA	NA	NA	Experimental - deliberate disease model	Yes	Treat	No	NA	NA	NA	NA	NA	NA	NA	NA	NA	NA	NA	NA	NA	NA	NA	NA	NA	NA	NA	NA	NA	NA
41788	3	2011	Iran	Rat	NA	NA	NA	NA	NA	NA	NA	NA	NA	NA	NA	NA	NA	NA	NA	NA	NA	NA	NA	Experimental - deliberate disease model	Yes	Treat	Yes	2	Yes	No (specify label if provided, e.g., &quot;turkish honey&quot;)	NA	No	NA	No	NA	NA	NA	NA	NA	Yes	No (specify label if provided, e.g., &quot;turkish honey&quot;)	NA	No	NA	Yes	NA	NA	NA	NA
41809	3	2011	Iran	Rat	NA	NA	NA	NA	NA	NA	NA	NA	NA	NA	NA	NA	NA	NA	NA	NA	NA	NA	NA	Experimental - deliberate disease model	Yes	Treat	No	NA	NA	NA	NA	NA	NA	NA	NA	NA	NA	NA	NA	NA	NA	NA	NA	NA	NA	NA	NA	NA	NA
41896	3	2011	Pakistan	Rat	NA	NA	NA	NA	NA	NA	NA	NA	NA	NA	NA	NA	NA	NA	NA	NA	NA	NA	NA	Experimental - deliberate disease model	Yes	Treat	No	NA	NA	NA	NA	NA	NA	NA	NA	NA	NA	NA	NA	NA	NA	NA	NA	NA	NA	NA	NA	NA	NA
41904	3	2011	Saudi Arabia	NA	Mouse / Mice	NA	NA	NA	NA	NA	NA	NA	NA	NA	NA	NA	NA	NA	NA	NA	NA	NA	NA	Experimental - deliberate disease model	Yes	Prevent	No	NA	NA	NA	NA	NA	NA	NA	NA	NA	NA	NA	NA	NA	NA	NA	NA	NA	NA	NA	NA	NA	NA
41910	3	2011	Turkey	Rat	NA	NA	NA	NA	NA	NA	NA	NA	NA	NA	NA	NA	NA	NA	NA	NA	NA	NA	NA	Experimental - deliberate disease model	Yes	Prevent	Yes	2	Yes	No (specify label if provided, e.g., &quot;turkish honey&quot;)	NA	No	NA	No	NA	NA	NA	NA	NA	Yes	No (specify label if provided, e.g., &quot;turkish honey&quot;)	NA	No	NA	Yes	NA	NA	Other bee products (Specify, e.g., bee venom, propolis, bee pollen, royal jelly, beeswax, bee bread)	bee pollen
41943	3	2011	Mexico	Rat	NA	NA	NA	NA	NA	NA	NA	NA	NA	NA	NA	NA	NA	NA	NA	NA	NA	NA	NA	Experimental - deliberate disease model	Yes	Prevent	No	NA	NA	NA	NA	NA	NA	NA	NA	NA	NA	NA	NA	NA	NA	NA	NA	NA	NA	NA	NA	NA	NA
41944	3	2011	Iran	Rat	NA	NA	NA	NA	NA	NA	NA	NA	NA	NA	NA	NA	NA	NA	NA	NA	NA	NA	NA	Experimental - deliberate disease model	Yes	Prevent	No	NA	NA	NA	NA	NA	NA	NA	NA	NA	NA	NA	NA	NA	NA	NA	NA	NA	NA	NA	NA	NA	NA
41953	3	2011	Iran	NA	NA	Rabbit	NA	NA	NA	NA	NA	NA	NA	NA	NA	NA	NA	NA	NA	NA	NA	NA	NA	Experimental - deliberate disease model	Yes	Treat	No	NA	NA	NA	NA	NA	NA	NA	NA	NA	NA	NA	NA	NA	NA	NA	NA	NA	NA	NA	NA	NA	NA
41963	3	2011	Iran	Rat	NA	NA	NA	NA	NA	NA	NA	NA	NA	NA	NA	NA	NA	NA	NA	NA	NA	NA	NA	Experimental - deliberate disease model	Yes	Prevent	No	NA	NA	NA	NA	NA	NA	NA	NA	NA	NA	NA	NA	NA	NA	NA	NA	NA	NA	NA	NA	NA	NA
41964	3	2011	Japan	NA	Mouse / Mice	NA	NA	NA	NA	NA	NA	NA	NA	NA	NA	NA	NA	NA	NA	NA	NA	NA	NA	Experimental - deliberate disease model	Yes	Treat	No	NA	NA	NA	NA	NA	NA	NA	NA	NA	NA	NA	NA	NA	NA	NA	NA	NA	NA	NA	NA	NA	NA
41979	3	2011	Malaysia	Rat	NA	NA	NA	NA	NA	NA	NA	NA	NA	NA	NA	NA	NA	NA	NA	NA	NA	NA	NA	Experimental - deliberate disease model	Yes	Treat	Yes	2	Yes	No (specify label if provided, e.g., &quot;turkish honey&quot;)	tualang honey	No	NA	No	NA	NA	NA	NA	NA	Yes	No (specify label if provided, e.g., &quot;turkish honey&quot;)	tualang honey	No	NA	Yes	NA	Drug	NA	NA
41981	3	2011	Malaysia	Rat	NA	NA	NA	NA	NA	NA	NA	NA	NA	NA	NA	NA	NA	NA	NA	NA	NA	NA	NA	Experimental - deliberate disease model	Yes	Treat	Yes	2	Yes	No (specify label if provided, e.g., &quot;turkish honey&quot;)	tualang honey	No	NA	No	NA	NA	NA	NA	NA	Yes	No (specify label if provided, e.g., &quot;turkish honey&quot;)	tualang honey	No	NA	Yes	NA	Drug	NA	NA
42020	3	2010	Malaysia	Rat	NA	NA	NA	NA	NA	NA	NA	NA	NA	NA	NA	NA	NA	NA	NA	NA	NA	NA	NA	Experimental - deliberate disease model	Yes	Prevent	No	NA	NA	NA	NA	NA	NA	NA	NA	NA	NA	NA	NA	NA	NA	NA	NA	NA	NA	NA	NA	NA	NA
42086	3	2010	Saudi Arabia	NA	Mouse / Mice	NA	NA	NA	NA	NA	NA	NA	NA	NA	NA	NA	NA	NA	NA	NA	NA	NA	NA	Experimental - deliberate disease model	Yes	Treat	No	NA	NA	NA	NA	NA	NA	NA	NA	NA	NA	NA	NA	NA	NA	NA	NA	NA	NA	NA	NA	NA	NA
42091	3	2010	Malaysia	Rat	NA	NA	NA	NA	NA	NA	NA	NA	NA	NA	NA	NA	NA	NA	NA	NA	NA	NA	NA	Experimental - deliberate disease model	Yes	Treat	No	NA	NA	NA	NA	NA	NA	NA	NA	NA	NA	NA	NA	NA	NA	NA	NA	NA	NA	NA	NA	NA	NA
42095	3	2010	Malaysia	Rat	NA	NA	NA	NA	NA	NA	NA	NA	NA	NA	NA	NA	NA	NA	NA	NA	NA	NA	NA	Experimental - deliberate disease model	Yes	Prevent	No	NA	NA	NA	NA	NA	NA	NA	NA	NA	NA	NA	NA	NA	NA	NA	NA	NA	NA	NA	NA	NA	NA
42168	3	2010	Iran	Rat	NA	NA	NA	NA	NA	NA	NA	NA	NA	NA	NA	NA	NA	NA	NA	NA	NA	NA	NA	Experimental - deliberate disease model	Yes	Treat	No	NA	NA	NA	NA	NA	NA	NA	NA	NA	NA	NA	NA	NA	NA	NA	NA	NA	NA	NA	NA	NA	NA
42173	3	2010	India	NA	Mouse / Mice	NA	NA	NA	NA	NA	NA	NA	NA	NA	NA	NA	NA	NA	NA	NA	NA	NA	NA	Experimental - deliberate disease model	Yes	Treat	Yes	2	Yes	No (specify label if provided, e.g., &quot;turkish honey&quot;)	NA	No	NA	No	NA	NA	NA	NA	NA	Yes	No (specify label if provided, e.g., &quot;turkish honey&quot;)	NA	No	NA	Yes	NA	NA	NA	NA
42280	3	2010	Turkey	Rat	NA	NA	NA	NA	NA	NA	NA	NA	NA	NA	NA	NA	NA	NA	NA	NA	NA	NA	NA	Experimental - deliberate disease model	Yes	Treat	No	NA	NA	NA	NA	NA	NA	NA	NA	NA	NA	NA	NA	NA	NA	NA	NA	NA	NA	NA	NA	NA	NA
42361	3	2009	Iran	Rat	NA	NA	NA	NA	NA	NA	NA	NA	NA	NA	NA	NA	NA	NA	NA	NA	NA	NA	NA	Experimental - deliberate disease model	Yes	Treat	No	NA	NA	NA	NA	NA	NA	NA	NA	NA	NA	NA	NA	NA	NA	NA	NA	NA	NA	NA	NA	NA	NA
42449	3	2009	Turkey	Rat	NA	NA	NA	NA	NA	NA	NA	NA	NA	NA	NA	NA	NA	NA	NA	NA	NA	NA	NA	Experimental - deliberate disease model	Yes	Prevent	No	NA	NA	NA	NA	NA	NA	NA	NA	NA	NA	NA	NA	NA	NA	NA	NA	NA	NA	NA	NA	NA	NA
42464	3	2009	New Zealand	Rat	NA	NA	NA	NA	NA	NA	NA	NA	NA	NA	NA	NA	NA	NA	NA	NA	NA	NA	NA	Experimental - deliberate disease model	Yes	Prevent	No	NA	NA	NA	NA	NA	NA	NA	NA	NA	NA	NA	NA	NA	NA	NA	NA	NA	NA	NA	NA	NA	NA
42480	3	2009	Iran	NA	NA	Rabbit	NA	NA	NA	NA	NA	NA	NA	NA	NA	NA	NA	NA	NA	NA	NA	NA	NA	Experimental - deliberate disease model	Yes	Treat	No	NA	NA	NA	NA	NA	NA	NA	NA	NA	NA	NA	NA	NA	NA	NA	NA	NA	NA	NA	NA	NA	NA
42491	3	2009	India	Rat	NA	NA	NA	NA	NA	NA	NA	NA	NA	NA	NA	NA	NA	NA	NA	NA	NA	NA	NA	Experimental - deliberate disease model	Yes	Treat	No	NA	NA	NA	NA	NA	NA	NA	NA	NA	NA	NA	NA	NA	NA	NA	NA	NA	NA	NA	NA	NA	NA
42582	3	2009	Turkey	Rat	NA	NA	NA	NA	NA	NA	NA	NA	NA	NA	NA	NA	NA	NA	NA	NA	NA	NA	NA	Experimental - deliberate disease model	Yes	Prevent	No	NA	NA	NA	NA	NA	NA	NA	NA	NA	NA	NA	NA	NA	NA	NA	NA	NA	NA	NA	NA	NA	NA
42587	3	2009	Iran	NA	NA	Rabbit	NA	NA	NA	NA	NA	NA	NA	NA	NA	NA	NA	NA	NA	NA	NA	NA	NA	Experimental - deliberate disease model	Yes	Treat	Yes	2	Yes	No (specify label if provided, e.g., &quot;turkish honey&quot;)	NA	No	NA	No	NA	NA	NA	NA	NA	Yes	No (specify label if provided, e.g., &quot;turkish honey&quot;)	NA	No	NA	Yes	Herbal product	NA	NA	NA
42656	3	2008	India	Rat	NA	NA	NA	NA	NA	NA	NA	NA	NA	NA	NA	NA	NA	NA	NA	NA	NA	NA	NA	Experimental - deliberate disease model	Yes	Prevent	No	NA	NA	NA	NA	NA	NA	NA	NA	NA	NA	NA	NA	NA	NA	NA	NA	NA	NA	NA	NA	NA	NA
42714	3	2008	India	Rat	NA	NA	NA	NA	NA	NA	NA	NA	NA	NA	NA	NA	NA	NA	NA	NA	NA	NA	NA	Experimental - deliberate disease model	Yes	Prevent	Yes	2	Yes	No (specify label if provided, e.g., &quot;turkish honey&quot;)	manuka honey	No	NA	No	NA	NA	NA	NA	NA	Yes	No (specify label if provided, e.g., &quot;turkish honey&quot;)	manuka honey	No	NA	Yes	NA	Drug	NA	NA
42813	3	2008	Turkey	Rat	NA	NA	NA	NA	NA	NA	NA	NA	NA	NA	NA	NA	NA	NA	NA	NA	NA	NA	NA	Experimental - deliberate disease model	Yes	Treat	No	NA	NA	NA	NA	NA	NA	NA	NA	NA	NA	NA	NA	NA	NA	NA	NA	NA	NA	NA	NA	NA	NA
42919	3	2007	Malaysia	Rat	NA	NA	NA	NA	NA	NA	NA	NA	NA	NA	NA	NA	NA	NA	NA	NA	NA	NA	NA	Experimental - deliberate disease model	Yes	Treat	No	NA	NA	NA	NA	NA	NA	NA	NA	NA	NA	NA	NA	NA	NA	NA	NA	NA	NA	NA	NA	NA	NA
42937	3	2007	Turkey	Rat	NA	NA	NA	NA	NA	NA	NA	NA	NA	NA	NA	NA	NA	NA	NA	NA	NA	NA	NA	Experimental - deliberate disease model	Yes	Treat	No	NA	NA	NA	NA	NA	NA	NA	NA	NA	NA	NA	NA	NA	NA	NA	NA	NA	NA	NA	NA	NA	NA
42953	3	2007	India	Rat	NA	NA	NA	NA	NA	NA	NA	NA	NA	NA	NA	NA	NA	NA	NA	NA	NA	NA	NA	Experimental - deliberate disease model	Yes	Treat	No	NA	NA	NA	NA	NA	NA	NA	NA	NA	NA	NA	NA	NA	NA	NA	NA	NA	NA	NA	NA	NA	NA
42957	3	2007	Saudi Arabia	Rat	NA	NA	NA	NA	NA	NA	NA	NA	NA	NA	NA	NA	NA	NA	NA	NA	NA	NA	NA	Experimental - deliberate disease model	Yes	Prevent	No	NA	NA	NA	NA	NA	NA	NA	NA	NA	NA	NA	NA	NA	NA	NA	NA	NA	NA	NA	NA	NA	NA
42978	3	2007	Nigeria	Rat	NA	NA	NA	NA	NA	NA	NA	NA	NA	NA	NA	NA	NA	NA	NA	NA	NA	NA	NA	Experimental - deliberate disease model	Yes	Treat	No	NA	NA	NA	NA	NA	NA	NA	NA	NA	NA	NA	NA	NA	NA	NA	NA	NA	NA	NA	NA	NA	NA
42995	3	2007	India	Rat	NA	NA	NA	NA	NA	NA	NA	NA	NA	NA	NA	NA	NA	NA	NA	NA	NA	NA	NA	Experimental - deliberate disease model	Yes	Treat	No	NA	NA	NA	NA	NA	NA	NA	NA	NA	NA	NA	NA	NA	NA	NA	NA	NA	NA	NA	NA	NA	NA
43030	3	2007	Pakistan	NA	Mouse / Mice	NA	NA	NA	NA	NA	NA	NA	NA	NA	NA	NA	NA	NA	NA	NA	NA	NA	NA	Experimental - deliberate disease model	Yes	Prevent	Yes	5	Yes	No (specify label if provided, e.g., &quot;turkish honey&quot;)	A. cerana wild honey	No	NA	No	NA	NA	NA	NA	NA	Yes	No (specify label if provided, e.g., &quot;turkish honey&quot;)	acacia modesta honey	No	NA	No	NA	NA	NA	NA
43125	3	2006	Australia	Rat	NA	NA	NA	NA	NA	NA	NA	NA	NA	NA	NA	NA	NA	NA	NA	NA	NA	NA	NA	Experimental - deliberate disease model	Yes	Treat	Yes	2	Yes	No (specify label if provided, e.g., &quot;turkish honey&quot;)	lavender honey	No	NA	No	NA	NA	NA	NA	NA	Yes	Yes (specify product name)	Medihoney¬Æ (Capillano Honey Ltd, Australia)	No	NA	No	NA	NA	NA	NA
43156	3	2006	India	Rat	NA	NA	NA	NA	NA	NA	NA	NA	NA	NA	NA	NA	NA	NA	NA	NA	NA	NA	NA	Experimental - deliberate disease model	Yes	Treat	No	NA	NA	NA	NA	NA	NA	NA	NA	NA	NA	NA	NA	NA	NA	NA	NA	NA	NA	NA	NA	NA	NA
43181	3	2006	Italy	Rat	NA	NA	NA	NA	NA	NA	NA	NA	NA	NA	NA	NA	NA	NA	NA	NA	NA	NA	NA	Experimental - deliberate disease model	Yes	Prevent	Yes	3	Yes	No (specify label if provided, e.g., &quot;turkish honey&quot;)	chestnut honey	No	NA	No	NA	NA	NA	NA	NA	Yes	No (specify label if provided, e.g., &quot;turkish honey&quot;)	chestnut honey	No	NA	Yes	Herbal product	NA	Other bee products (Specify, e.g., bee venom, propolis, bee pollen, royal jelly, beeswax, bee bread)	propolis
43414	3	2004	Turkey	NA	NA	NA	NA	NA	Dog	NA	NA	NA	NA	NA	NA	NA	NA	NA	NA	NA	NA	NA	NA	Experimental - deliberate disease model	Yes	Treat	No	NA	NA	NA	NA	NA	NA	NA	NA	NA	NA	NA	NA	NA	NA	NA	NA	NA	NA	NA	NA	NA	NA
43471	3	2004	The Netherlands	NA	NA	NA	Pigs	NA	NA	NA	NA	NA	NA	NA	NA	NA	NA	NA	NA	NA	NA	NA	NA	Experimental - deliberate disease model	Yes	Treat	No	NA	NA	NA	NA	NA	NA	NA	NA	NA	NA	NA	NA	NA	NA	NA	NA	NA	NA	NA	NA	NA	NA
43505	3	2004	Poland	NA	NA	NA	Pigs	NA	NA	NA	NA	NA	NA	NA	NA	NA	NA	NA	NA	NA	NA	NA	NA	Experimental - deliberate disease model	Yes	Treat	No	NA	NA	NA	NA	NA	NA	NA	NA	NA	NA	NA	NA	NA	NA	NA	NA	NA	NA	NA	NA	NA	NA
43699	3	2002	Turkey	Rat	NA	NA	NA	NA	NA	NA	NA	NA	NA	NA	NA	NA	NA	NA	NA	NA	NA	NA	NA	Experimental - deliberate disease model	Yes	Prevent	No	NA	NA	NA	NA	NA	NA	NA	NA	NA	NA	NA	NA	NA	NA	NA	NA	NA	NA	NA	NA	NA	NA
43769	3	2002	Turkey	Rat	NA	NA	NA	NA	NA	NA	NA	NA	NA	NA	NA	NA	NA	NA	NA	NA	NA	NA	NA	Experimental - deliberate disease model	Yes	Treat	No	NA	NA	NA	NA	NA	NA	NA	NA	NA	NA	NA	NA	NA	NA	NA	NA	NA	NA	NA	NA	NA	NA
43900	3	2000	Turkey	NA	Mouse / Mice	NA	NA	NA	NA	NA	NA	NA	NA	NA	NA	NA	NA	NA	NA	NA	NA	NA	NA	Experimental - deliberate disease model	Yes	Prevent	No	NA	NA	NA	NA	NA	NA	NA	NA	NA	NA	NA	NA	NA	NA	NA	NA	NA	NA	NA	NA	NA	NA
44114	3	1998	Iran	NA	NA	Rabbit	NA	NA	NA	NA	NA	NA	NA	NA	NA	NA	NA	NA	NA	NA	NA	NA	NA	Experimental - deliberate disease model	Yes	Treat	No	NA	NA	NA	NA	NA	NA	NA	NA	NA	NA	NA	NA	NA	NA	NA	NA	NA	NA	NA	NA	NA	NA
44152	3	1997	Saudi Arabia	Rat	NA	NA	NA	NA	NA	NA	NA	NA	NA	NA	NA	NA	NA	NA	NA	NA	NA	NA	NA	Experimental - deliberate disease model	Yes	Prevent	No	NA	NA	NA	NA	NA	NA	NA	NA	NA	NA	NA	NA	NA	NA	NA	NA	NA	NA	NA	NA	NA	NA
44655	3	1983	Israel	NA	Mouse / Mice	NA	NA	NA	NA	NA	NA	NA	NA	NA	NA	NA	NA	NA	NA	NA	NA	NA	NA	Experimental - deliberate disease model	Yes	Treat	No	NA	NA	NA	NA	NA	NA	NA	NA	NA	NA	NA	NA	NA	NA	NA	NA	NA	NA	NA	NA	NA	NA
44839	3	2019	Iran	Rat	NA	NA	NA	NA	NA	NA	NA	NA	NA	NA	NA	NA	NA	NA	NA	NA	NA	NA	NA	Experimental - deliberate disease model	Yes	Treat	Yes	2	Yes	No (specify label if provided, e.g., &quot;turkish honey&quot;)	NA	No	NA	Yes	Drug	NA	NA	NA	NA	Yes	No (specify label if provided, e.g., &quot;turkish honey&quot;)	NA	No	NA	Yes	NA	Drug	NA	NA
44913	3	2019	Algeria	Rat	NA	NA	NA	NA	NA	NA	NA	NA	NA	NA	NA	NA	NA	NA	NA	NA	NA	NA	NA	Experimental - deliberate disease model	Yes	Treat	Yes	2	Yes	No (specify label if provided, e.g., &quot;turkish honey&quot;)	euphorbia honey	No	NA	No	NA	NA	NA	NA	NA	Yes	No (specify label if provided, e.g., &quot;turkish honey&quot;)	euphorbia honey	No	NA	Yes	Herbal product	NA	NA	NA
44967	3	2019	Saudi Arabia	Rat	NA	NA	NA	NA	NA	NA	NA	NA	NA	NA	NA	NA	NA	NA	NA	NA	NA	NA	NA	Experimental - deliberate disease model	Yes	Prevent	Yes	2	Yes	No (specify label if provided, e.g., &quot;turkish honey&quot;)	sidr honey	No	NA	No	NA	NA	NA	NA	NA	Yes	No (specify label if provided, e.g., &quot;turkish honey&quot;)	sidr honey	No	NA	Yes	NA	NA	NA	NA
45056	3	2019	USA	NA	Mouse / Mice	NA	NA	NA	NA	NA	NA	NA	NA	NA	NA	NA	NA	NA	NA	NA	NA	NA	NA	Experimental - deliberate disease model	Yes	Treat	Yes	2	Yes	Yes (specify product name)	manuka honey (ManukaGuard, UMF 12+)	No	NA	No	NA	NA	NA	NA	NA	Yes	Yes (specify product name)	manuka honey (ManukaGuard, UMF 12+)	No	NA	Yes	NA	NA	NA	NA
45435	3	2018	Malaysia	Rat	NA	NA	NA	NA	NA	NA	NA	NA	NA	NA	NA	NA	NA	NA	NA	NA	NA	NA	NA	Systematic review	Yes	Treat	NA	NA	NA	NA	NA	NA	NA	NA	NA	NA	NA	NA	NA	NA	NA	NA	NA	NA	NA	NA	NA	NA	NA
46013	3	2004	Nigeria	Rat	NA	NA	NA	NA	NA	NA	NA	NA	NA	NA	NA	NA	NA	NA	NA	NA	NA	NA	NA	Experimental - deliberate disease model	Yes	Treat	No	NA	NA	NA	NA	NA	NA	NA	NA	NA	NA	NA	NA	NA	NA	NA	NA	NA	NA	NA	NA	NA	NA
46138	3	2003	Saudi Arabia	Rat	NA	NA	NA	NA	NA	NA	NA	NA	NA	NA	NA	NA	NA	NA	NA	NA	NA	NA	NA	Experimental - deliberate disease model	Yes	Prevent	Yes	2	Yes	No (specify label if provided, e.g., &quot;turkish honey&quot;)	NA	No	NA	No	NA	NA	NA	NA	NA	Yes	No (specify label if provided, e.g., &quot;turkish honey&quot;)	NA	No	NA	Yes	NA	Drug	NA	NA
46252	3	2002	Algeria	Rat	NA	NA	NA	NA	NA	NA	NA	NA	NA	NA	NA	NA	NA	NA	NA	NA	NA	NA	NA	Experimental - deliberate disease model	Yes	Prevent	No	NA	NA	NA	NA	NA	NA	NA	NA	NA	NA	NA	NA	NA	NA	NA	NA	NA	NA	NA	NA	NA	NA
46372	3	2001	Hungary	Rat	NA	NA	NA	NA	NA	NA	NA	NA	NA	NA	NA	NA	NA	NA	NA	NA	NA	NA	NA	Experimental - deliberate disease model	Yes	Prevent	No	NA	NA	NA	NA	NA	NA	NA	NA	NA	NA	NA	NA	NA	NA	NA	NA	NA	NA	NA	NA	NA	NA
46408	3	2001	Algeria	Rat	NA	NA	NA	NA	NA	NA	NA	NA	NA	NA	NA	NA	NA	NA	NA	NA	NA	NA	NA	Experimental - deliberate disease model	Yes	Prevent	No	NA	NA	NA	NA	NA	NA	NA	NA	NA	NA	NA	NA	NA	NA	NA	NA	NA	NA	NA	NA	NA	NA
47673	3	2010	Turkey	NA	Mouse / Mice	NA	NA	NA	NA	NA	NA	NA	NA	NA	NA	NA	NA	NA	NA	NA	NA	NA	NA	Experimental - deliberate disease model	Yes	Prevent	No	NA	NA	NA	NA	NA	NA	NA	NA	NA	NA	NA	NA	NA	NA	NA	NA	NA	NA	NA	NA	NA	NA
47744	3	2009	Turkey	Rat	NA	NA	NA	NA	NA	NA	NA	NA	NA	NA	NA	NA	NA	NA	NA	NA	NA	NA	NA	Experimental - deliberate disease model	Yes	Treat	No	NA	NA	NA	NA	NA	NA	NA	NA	NA	NA	NA	NA	NA	NA	NA	NA	NA	NA	NA	NA	NA	NA
47904	3	2009	Turkey	Rat	NA	NA	NA	NA	NA	NA	NA	NA	NA	NA	NA	NA	NA	NA	NA	NA	NA	NA	NA	Experimental - deliberate disease model	Yes	Prevent	No	NA	NA	NA	NA	NA	NA	NA	NA	NA	NA	NA	NA	NA	NA	NA	NA	NA	NA	NA	NA	NA	NA
48112	3	2008	India	Rat	NA	NA	NA	NA	NA	NA	NA	NA	NA	NA	NA	NA	NA	NA	NA	NA	NA	NA	NA	Experimental - deliberate disease model	Yes	Treat	No	NA	NA	NA	NA	NA	NA	NA	NA	NA	NA	NA	NA	NA	NA	NA	NA	NA	NA	NA	NA	NA	NA
48149	3	2008	Turkey	Rat	NA	NA	NA	NA	NA	NA	NA	NA	NA	NA	NA	NA	NA	NA	NA	NA	NA	NA	NA	Experimental - deliberate disease model	Yes	Prevent	No	NA	NA	NA	NA	NA	NA	NA	NA	NA	NA	NA	NA	NA	NA	NA	NA	NA	NA	NA	NA	NA	NA
48167	3	2008	Turkey	Rat	NA	NA	NA	NA	NA	NA	NA	NA	NA	NA	NA	NA	NA	NA	NA	NA	NA	NA	NA	Experimental - deliberate disease model	Yes	Prevent	No	NA	NA	NA	NA	NA	NA	NA	NA	NA	NA	NA	NA	NA	NA	NA	NA	NA	NA	NA	NA	NA	NA
48206	3	2008	India	Rat	NA	NA	NA	NA	NA	NA	NA	NA	NA	NA	NA	NA	NA	NA	NA	NA	NA	NA	NA	Experimental - deliberate disease model	Yes	Treat	No	NA	NA	NA	NA	NA	NA	NA	NA	NA	NA	NA	NA	NA	NA	NA	NA	NA	NA	NA	NA	NA	NA
48262	3	2008	Egypt	NA	Mouse / Mice	NA	NA	NA	NA	NA	NA	NA	NA	NA	NA	NA	NA	NA	NA	NA	NA	NA	NA	Experimental - deliberate disease model	Yes	Prevent	No	NA	NA	NA	NA	NA	NA	NA	NA	NA	NA	NA	NA	NA	NA	NA	NA	NA	NA	NA	NA	NA	NA
48491	3	2006	United Arab Emirates	Rat	NA	NA	NA	NA	NA	NA	NA	NA	NA	NA	NA	NA	NA	NA	NA	NA	NA	NA	NA	Experimental - deliberate disease model	Yes	Prevent	No	NA	NA	NA	NA	NA	NA	NA	NA	NA	NA	NA	NA	NA	NA	NA	NA	NA	NA	NA	NA	NA	NA
48494	3	2006	United Arab Emirates	Rat	NA	NA	NA	NA	NA	NA	NA	NA	NA	NA	NA	NA	NA	NA	NA	NA	NA	NA	NA	Experimental - deliberate disease model	Yes	Prevent	No	NA	NA	NA	NA	NA	NA	NA	NA	NA	NA	NA	NA	NA	NA	NA	NA	NA	NA	NA	NA	NA	NA
48609	3	2006	Egypt	NA	Mouse / Mice	NA	NA	NA	NA	NA	NA	NA	NA	NA	NA	NA	NA	NA	NA	NA	NA	NA	NA	Experimental - deliberate disease model	Yes	Prevent	No	NA	NA	NA	NA	NA	NA	NA	NA	NA	NA	NA	NA	NA	NA	NA	NA	NA	NA	NA	NA	NA	NA
48693	3	2013	Nigeria	Rat	NA	NA	NA	NA	NA	NA	NA	NA	NA	NA	NA	NA	NA	NA	NA	NA	NA	NA	NA	Experimental - deliberate disease model	Yes	Prevent	No	NA	NA	NA	NA	NA	NA	NA	NA	NA	NA	NA	NA	NA	NA	NA	NA	NA	NA	NA	NA	NA	NA
48701	3	2014	Iran	Rat	NA	NA	NA	NA	NA	NA	NA	NA	NA	NA	NA	NA	NA	NA	NA	NA	NA	NA	NA	Experimental - deliberate disease model	Yes	Prevent	No	NA	NA	NA	NA	NA	NA	NA	NA	NA	NA	NA	NA	NA	NA	NA	NA	NA	NA	NA	NA	NA	NA
48898	3	2013	Iran	Rat	NA	NA	NA	NA	NA	NA	NA	NA	NA	NA	NA	NA	NA	NA	NA	NA	NA	NA	NA	Experimental - deliberate disease model	Yes	Prevent	No	NA	NA	NA	NA	NA	NA	NA	NA	NA	NA	NA	NA	NA	NA	NA	NA	NA	NA	NA	NA	NA	NA
49220	3	2012	Iran	Rat	NA	NA	NA	NA	NA	NA	NA	NA	NA	NA	NA	NA	NA	NA	NA	NA	NA	NA	NA	Experimental - deliberate disease model	Yes	Treat	Yes	2	Yes	No (specify label if provided, e.g., &quot;turkish honey&quot;)	Ilam honey	No	NA	No	NA	NA	NA	NA	NA	Yes	No (specify label if provided, e.g., &quot;turkish honey&quot;)	Ilam honey	No	NA	Yes	NA	Drug	NA	NA
49512	3	2011	Nigeria	Rat	NA	NA	NA	NA	NA	NA	NA	NA	NA	NA	NA	NA	NA	NA	NA	NA	NA	NA	NA	Experimental - deliberate disease model	Yes	Prevent	No	NA	NA	NA	NA	NA	NA	NA	NA	NA	NA	NA	NA	NA	NA	NA	NA	NA	NA	NA	NA	NA	NA
49566	3	2012	Nigeria	NA	NA	NA	NA	NA	Dog	NA	NA	NA	NA	NA	NA	NA	NA	NA	NA	NA	NA	NA	NA	Experimental - deliberate disease model	Yes	Treat	Yes	2	Yes	No (specify label if provided, e.g., &quot;turkish honey&quot;)	NA	No	NA	No	NA	NA	NA	NA	NA	Yes	No (specify label if provided, e.g., &quot;turkish honey&quot;)	NA	No	NA	Yes	NA	NA	NA	NA
49730	3	2011	Malaysia	Rat	NA	NA	NA	NA	NA	NA	NA	NA	NA	NA	NA	NA	NA	NA	NA	NA	NA	NA	NA	Experimental - deliberate disease model	Yes	Treat	No	NA	NA	NA	NA	NA	NA	NA	NA	NA	NA	NA	NA	NA	NA	NA	NA	NA	NA	NA	NA	NA	NA
49877	3	2011	Mexico	Rat	NA	NA	NA	NA	NA	NA	NA	NA	NA	NA	NA	NA	NA	NA	NA	NA	NA	NA	NA	Experimental - deliberate disease model	Yes	Prevent	No	NA	NA	NA	NA	NA	NA	NA	NA	NA	NA	NA	NA	NA	NA	NA	NA	NA	NA	NA	NA	NA	NA
50149	3	2016	Malaysia	Rat	NA	NA	NA	NA	NA	NA	NA	NA	NA	NA	NA	NA	NA	NA	NA	NA	NA	NA	NA	Experimental - deliberate disease model	Yes	Prevent	No	NA	NA	NA	NA	NA	NA	NA	NA	NA	NA	NA	NA	NA	NA	NA	NA	NA	NA	NA	NA	NA	NA
50256	3	2015	USA	NA	NA	NA	Pigs	NA	NA	NA	NA	NA	NA	NA	NA	NA	NA	NA	NA	NA	NA	NA	NA	Experimental - deliberate disease model	Yes	Treat	No	NA	NA	NA	NA	NA	NA	NA	NA	NA	NA	NA	NA	NA	NA	NA	NA	NA	NA	NA	NA	NA	NA
50477	3	2015	Nigeria	Rat	NA	NA	NA	NA	NA	NA	NA	NA	NA	NA	NA	NA	NA	NA	NA	NA	NA	NA	NA	Experimental - deliberate disease model	Yes	Prevent	No	NA	NA	NA	NA	NA	NA	NA	NA	NA	NA	NA	NA	NA	NA	NA	NA	NA	NA	NA	NA	NA	NA
50503	3	2014	Malaysia	NA	Mouse / Mice	NA	NA	NA	NA	NA	NA	NA	NA	NA	NA	NA	NA	NA	NA	NA	NA	NA	NA	Experimental - deliberate disease model	Yes	Treat	Yes	2	Yes	No (specify label if provided, e.g., &quot;turkish honey&quot;)	NA	No	NA	No	NA	NA	NA	NA	NA	No	NA	NA	Yes (specify which derivative it was, e.g., chrysin)	eugenol	No	NA	NA	NA	NA
50532	3	2014	Turkey	Rat	NA	NA	NA	NA	NA	NA	NA	NA	NA	NA	NA	NA	NA	NA	NA	NA	NA	NA	NA	Experimental - deliberate disease model	Yes	Prevent	No	NA	NA	NA	NA	NA	NA	NA	NA	NA	NA	NA	NA	NA	NA	NA	NA	NA	NA	NA	NA	NA	NA
50962	3	2014	Malaysia	Rat	NA	NA	NA	NA	NA	NA	NA	NA	NA	NA	NA	NA	NA	NA	NA	NA	NA	NA	NA	Experimental - deliberate disease model	Yes	Prevent	No	NA	NA	NA	NA	NA	NA	NA	NA	NA	NA	NA	NA	NA	NA	NA	NA	NA	NA	NA	NA	NA	NA
51250	3	2017	Iran	Rat	NA	NA	NA	NA	NA	NA	NA	NA	NA	NA	NA	NA	NA	NA	NA	NA	NA	NA	NA	Experimental - deliberate disease model	Yes	Prevent	No	NA	NA	NA	NA	NA	NA	NA	NA	NA	NA	NA	NA	NA	NA	NA	NA	NA	NA	NA	NA	NA	NA
51294	3	2017	India	Rat	NA	NA	NA	NA	NA	NA	NA	NA	NA	NA	NA	NA	NA	NA	NA	NA	NA	NA	NA	Experimental - deliberate disease model	Yes	Treat	No	NA	NA	NA	NA	NA	NA	NA	NA	NA	NA	NA	NA	NA	NA	NA	NA	NA	NA	NA	NA	NA	NA
51407	3	2016	India	NA	Mouse / Mice	NA	NA	NA	NA	NA	NA	NA	NA	NA	NA	NA	NA	NA	NA	NA	NA	NA	NA	Experimental - deliberate disease model	Yes	Prevent	Yes	2	Yes	No (specify label if provided, e.g., &quot;turkish honey&quot;)	NA	No	NA	No	NA	NA	NA	NA	NA	Yes	No (specify label if provided, e.g., &quot;turkish honey&quot;)	NA	No	NA	Yes	Herbal product	NA	NA	NA
51752	3	2018	Malaysia	NA	Mouse / Mice	NA	NA	NA	NA	NA	NA	NA	NA	NA	NA	NA	NA	NA	NA	NA	NA	NA	NA	Experimental - deliberate disease model	Yes	Treat	No	NA	NA	NA	NA	NA	NA	NA	NA	NA	NA	NA	NA	NA	NA	NA	NA	NA	NA	NA	NA	NA	NA
51972	3	2016	Iran	Rat	NA	NA	NA	NA	NA	NA	NA	NA	NA	NA	NA	NA	NA	NA	NA	NA	NA	NA	NA	Experimental - deliberate disease model	Yes	Treat	Yes	2	Yes	No (specify label if provided, e.g., &quot;turkish honey&quot;)	thymus honey	No	NA	No	NA	NA	NA	NA	NA	Yes	No (specify label if provided, e.g., &quot;turkish honey&quot;)	thymus honey	No	NA	Yes	NA	NA	Other bee products (Specify, e.g., bee venom, propolis, bee pollen, royal jelly, beeswax, bee bread)	propolis
53304	3	2018	Iran	Rat	NA	NA	NA	NA	NA	NA	NA	NA	NA	NA	NA	NA	NA	NA	NA	NA	NA	NA	NA	Experimental - deliberate disease model	Yes	Treat	No	NA	NA	NA	NA	NA	NA	NA	NA	NA	NA	NA	NA	NA	NA	NA	NA	NA	NA	NA	NA	NA	NA
53426	3	2014	Indonesia	Rat	NA	NA	NA	NA	NA	NA	NA	NA	NA	NA	NA	NA	NA	NA	NA	NA	NA	NA	NA	Experimental - deliberate disease model	Yes	Treat	Yes	2	Yes	No (specify label if provided, e.g., &quot;turkish honey&quot;)	NA	No	NA	No	NA	NA	NA	NA	NA	Yes	No (specify label if provided, e.g., &quot;turkish honey&quot;)	NA	No	NA	Yes	NA	NA	NA	NA
53428	3	2005	Turkey	Rat	NA	NA	NA	NA	NA	NA	NA	NA	NA	NA	NA	NA	NA	NA	NA	NA	NA	NA	NA	Experimental - deliberate disease model	Yes	Prevent	No	NA	NA	NA	NA	NA	NA	NA	NA	NA	NA	NA	NA	NA	NA	NA	NA	NA	NA	NA	NA	NA	NA
53430	3	2005	Turkey	Rat	NA	NA	NA	NA	NA	NA	NA	NA	NA	NA	NA	NA	NA	NA	NA	NA	NA	NA	NA	Experimental - deliberate disease model	Yes	Treat	No	NA	NA	NA	NA	NA	NA	NA	NA	NA	NA	NA	NA	NA	NA	NA	NA	NA	NA	NA	NA	NA	NA
53432	3	2006	Malaysia	Rat	NA	NA	NA	NA	NA	NA	NA	NA	NA	NA	NA	NA	NA	NA	NA	NA	NA	NA	NA	Experimental - deliberate disease model	Yes	Prevent	Yes	4	Yes	No (specify label if provided, e.g., &quot;turkish honey&quot;)	NA	No	NA	No	NA	NA	NA	NA	NA	Yes	No (specify label if provided, e.g., &quot;turkish honey&quot;)	NA	No	NA	Yes	NA	NA	NA	NA
53433	3	2011	Malaysia	Rat	NA	NA	NA	NA	NA	NA	NA	NA	NA	NA	NA	NA	NA	NA	NA	NA	NA	NA	NA	Experimental - deliberate disease model	Yes	Prevent	No	NA	NA	NA	NA	NA	NA	NA	NA	NA	NA	NA	NA	NA	NA	NA	NA	NA	NA	NA	NA	NA	NA
53434	3	2016	Malaysia	Rat	NA	NA	NA	NA	NA	NA	NA	NA	NA	NA	NA	NA	NA	NA	NA	NA	NA	NA	NA	Experimental - deliberate disease model	Yes	Treat	No	NA	NA	NA	NA	NA	NA	NA	NA	NA	NA	NA	NA	NA	NA	NA	NA	NA	NA	NA	NA	NA	NA
53435	3	2017	Malaysia	Rat	NA	NA	NA	NA	NA	NA	NA	NA	NA	NA	NA	NA	NA	NA	NA	NA	NA	NA	NA	Experimental - deliberate disease model	Yes	Prevent	No	NA	NA	NA	NA	NA	NA	NA	NA	NA	NA	NA	NA	NA	NA	NA	NA	NA	NA	NA	NA	NA	NA
53437	3	2012	Iraq	Rat	NA	NA	NA	NA	NA	NA	NA	NA	NA	NA	NA	NA	NA	NA	NA	NA	NA	NA	NA	Experimental - deliberate disease model	Yes	Prevent	No	NA	NA	NA	NA	NA	NA	NA	NA	NA	NA	NA	NA	NA	NA	NA	NA	NA	NA	NA	NA	NA	NA
53438	3	2014	Malaysia	Rat	NA	NA	NA	NA	NA	NA	NA	NA	NA	NA	NA	NA	NA	NA	NA	NA	NA	NA	NA	Experimental - deliberate disease model	Yes	Prevent	No	NA	NA	NA	NA	NA	NA	NA	NA	NA	NA	NA	NA	NA	NA	NA	NA	NA	NA	NA	NA	NA	NA
53440	3	2007	Turkey	NA	Mouse / Mice	NA	NA	NA	NA	NA	NA	NA	NA	NA	NA	NA	NA	NA	NA	NA	NA	NA	NA	Experimental - deliberate disease model	Yes	Treat	No	NA	NA	NA	NA	NA	NA	NA	NA	NA	NA	NA	NA	NA	NA	NA	NA	NA	NA	NA	NA	NA	NA
53442	3	2011	Malaysia	Rat	NA	NA	NA	NA	NA	NA	NA	NA	NA	NA	NA	NA	NA	NA	NA	NA	NA	NA	NA	Experimental - deliberate disease model	Yes	Prevent	No	NA	NA	NA	NA	NA	NA	NA	NA	NA	NA	NA	NA	NA	NA	NA	NA	NA	NA	NA	NA	NA	NA
53443	3	1998	Iran	NA	NA	Rabbit	NA	NA	NA	NA	NA	NA	NA	NA	NA	NA	NA	NA	NA	NA	NA	NA	NA	Experimental - deliberate disease model	Yes	Treat	No	NA	NA	NA	NA	NA	NA	NA	NA	NA	NA	NA	NA	NA	NA	NA	NA	NA	NA	NA	NA	NA	NA
53444	3	2004	Malaysia	Rat	NA	NA	NA	NA	NA	NA	NA	NA	NA	NA	NA	NA	NA	NA	NA	NA	NA	NA	NA	Experimental - deliberate disease model	Yes	Treat	Yes	5	Yes	No (specify label if provided, e.g., &quot;turkish honey&quot;)	durian honey	No	NA	No	NA	NA	NA	NA	NA	Yes	No (specify label if provided, e.g., &quot;turkish honey&quot;)	gelam honey	No	NA	No	NA	NA	NA	NA
53445	3	2006	Malaysia	Rat	NA	NA	NA	NA	NA	NA	NA	NA	NA	NA	NA	NA	NA	NA	NA	NA	NA	NA	NA	Experimental - deliberate disease model	Yes	Treat	Yes	2	Yes	No (specify label if provided, e.g., &quot;turkish honey&quot;)	NA	No	NA	No	NA	NA	NA	NA	NA	Yes	No (specify label if provided, e.g., &quot;turkish honey&quot;)	NA	No	NA	Yes	NA	NA	NA	NA
9276	3	2012	Malaysia	Rat	NA	NA	NA	NA	NA	NA	NA	NA	NA	NA	NA	NA	NA	NA	NA	NA	NA	NA	NA	Experimental - deliberate disease model	Yes	Treat	No	NA	NA	NA	NA	NA	NA	NA	NA	NA	NA	NA	NA	NA	NA	NA	NA	NA	NA	NA	NA	NA	NA
9291	3	2019	Iran	NA	NA	Rabbit	NA	NA	NA	NA	NA	NA	NA	NA	NA	NA	NA	NA	NA	NA	NA	NA	NA	Experimental - deliberate disease model	Yes	Prevent	No	NA	NA	NA	NA	NA	NA	NA	NA	NA	NA	NA	NA	NA	NA	NA	NA	NA	NA	NA	NA	NA	NA
9293	3	2017	Italy	Rat	NA	NA	NA	NA	NA	NA	NA	NA	NA	NA	NA	NA	NA	NA	NA	NA	NA	NA	NA	Experimental - deliberate disease model	Yes	Treat	Yes	2	Yes	Yes (specify product name)	Medihoney 440	No	NA	No	NA	NA	NA	NA	NA	Yes	Yes (specify product name)	Medihoney 440	No	NA	Yes	NA	NA	NA	NA
9307	3	2017	Pakistan	NA	Mouse / Mice	NA	NA	NA	NA	NA	NA	NA	NA	NA	NA	NA	NA	NA	NA	NA	NA	NA	NA	Experimental - deliberate disease model	Yes	Treat	No	NA	NA	NA	NA	NA	NA	NA	NA	NA	NA	NA	NA	NA	NA	NA	NA	NA	NA	NA	NA	NA	NA
9311	3	2008	Iran	NA	NA	Rabbit	NA	NA	NA	NA	NA	NA	NA	NA	NA	NA	NA	NA	NA	NA	NA	NA	NA	Experimental - deliberate disease model	Yes	Treat	No	NA	NA	NA	NA	NA	NA	NA	NA	NA	NA	NA	NA	NA	NA	NA	NA	NA	NA	NA	NA	NA	NA
9328	3	2015	Egypt	Rat	NA	NA	NA	NA	NA	NA	NA	NA	NA	NA	NA	NA	NA	NA	NA	NA	NA	NA	NA	Experimental - deliberate disease model	Yes	Prevent	No	NA	NA	NA	NA	NA	NA	NA	NA	NA	NA	NA	NA	NA	NA	NA	NA	NA	NA	NA	NA	NA	NA
9329	3	2017	Iran	Rat	NA	NA	NA	NA	NA	NA	NA	NA	NA	NA	NA	NA	NA	NA	NA	NA	NA	NA	NA	Experimental - deliberate disease model	Yes	Treat	No	NA	NA	NA	NA	NA	NA	NA	NA	NA	NA	NA	NA	NA	NA	NA	NA	NA	NA	NA	NA	NA	NA
9341	3	2007	Iran	NA	NA	NA	NA	NA	Dog	NA	NA	NA	NA	NA	NA	NA	NA	NA	NA	NA	NA	NA	NA	Experimental - deliberate disease model	Yes	Treat	No	NA	NA	NA	NA	NA	NA	NA	NA	NA	NA	NA	NA	NA	NA	NA	NA	NA	NA	NA	NA	NA	NA
9343	3	2004	Malaysia	Rat	NA	NA	NA	NA	NA	NA	NA	NA	NA	NA	NA	NA	NA	NA	NA	NA	NA	NA	NA	Experimental - deliberate disease model	Yes	Treat	Yes	2	Yes	No (specify label if provided, e.g., &quot;turkish honey&quot;)	gelam honey	No	NA	No	NA	NA	NA	NA	NA	Yes	No (specify label if provided, e.g., &quot;turkish honey&quot;)	nenas honey	No	NA	No	NA	NA	NA	NA
9344	3	2004	Malaysia	Rat	NA	NA	NA	NA	NA	NA	NA	NA	NA	NA	NA	NA	NA	NA	NA	NA	NA	NA	NA	Experimental - deliberate disease model	Yes	Treat	Yes	2	Yes	No (specify label if provided, e.g., &quot;turkish honey&quot;)	gelam honey	No	NA	No	NA	NA	NA	NA	NA	Yes	No (specify label if provided, e.g., &quot;turkish honey&quot;)	nenas honey	No	NA	No	NA	NA	NA	NA
9346	3	2011	Romania	Rat	NA	NA	NA	NA	NA	NA	NA	NA	NA	NA	NA	NA	NA	NA	NA	NA	NA	NA	NA	Experimental - deliberate disease model	Yes	Treat	No	NA	NA	NA	NA	NA	NA	NA	NA	NA	NA	NA	NA	NA	NA	NA	NA	NA	NA	NA	NA	NA	NA
9349	3	2019	Pakistan	NA	Mouse / Mice	NA	NA	NA	NA	NA	NA	NA	NA	NA	NA	NA	NA	NA	NA	NA	NA	NA	NA	Experimental - deliberate disease model	Yes	Treat	No	NA	NA	NA	NA	NA	NA	NA	NA	NA	NA	NA	NA	NA	NA	NA	NA	NA	NA	NA	NA	NA	NA
9356	3	2012	Algeria	NA	NA	Rabbit	NA	NA	NA	NA	NA	NA	NA	NA	NA	NA	NA	NA	NA	NA	NA	NA	NA	Experimental - deliberate disease model	Yes	Treat	Yes	2	Yes	No (specify label if provided, e.g., &quot;turkish honey&quot;)	NA	No	NA	No	NA	NA	NA	NA	NA	Yes	No (specify label if provided, e.g., &quot;turkish honey&quot;)	NA	No	NA	Yes	NA	NA	NA	NA
9366	3	2015	Iran	Rat	NA	NA	NA	NA	NA	NA	NA	NA	NA	NA	NA	NA	NA	NA	NA	NA	NA	NA	NA	Experimental - deliberate disease model	Yes	Treat	No	NA	NA	NA	NA	NA	NA	NA	NA	NA	NA	NA	NA	NA	NA	NA	NA	NA	NA	NA	NA	NA	NA
9379	3	2018	Morocco	NA	Mouse / Mice	NA	NA	NA	NA	NA	NA	NA	NA	NA	NA	NA	NA	NA	NA	NA	NA	NA	NA	Experimental - deliberate disease model	Yes	Treat	No	NA	NA	NA	NA	NA	NA	NA	NA	NA	NA	NA	NA	NA	NA	NA	NA	NA	NA	NA	NA	NA	NA
9394	3	2017	Brazil	Rat	NA	NA	NA	NA	NA	NA	NA	NA	NA	NA	NA	NA	NA	NA	NA	NA	NA	NA	NA	Experimental - deliberate disease model	Yes	Treat	Yes	2	Yes	No (specify label if provided, e.g., &quot;turkish honey&quot;)	africanized bee honey	No	NA	No	NA	NA	NA	NA	NA	Yes	No (specify label if provided, e.g., &quot;turkish honey&quot;)	africanized bee honey	No	NA	Yes	NA	Drug	NA	NA
9501	3	2015	Iran	Rat	NA	NA	NA	NA	NA	NA	NA	NA	NA	NA	NA	NA	NA	NA	NA	NA	NA	NA	NA	Experimental - deliberate disease model	Yes	Prevent	No	NA	NA	NA	NA	NA	NA	NA	NA	NA	NA	NA	NA	NA	NA	NA	NA	NA	NA	NA	NA	NA	NA
9528	3	2019	Indonesia	Rat	NA	NA	NA	NA	NA	NA	NA	NA	NA	NA	NA	NA	NA	NA	NA	NA	NA	NA	NA	Experimental - deliberate disease model	Yes	Prevent	No	NA	NA	NA	NA	NA	NA	NA	NA	NA	NA	NA	NA	NA	NA	NA	NA	NA	NA	NA	NA	NA	NA
9581	3	2017	Indonesia	NA	Mouse / Mice	NA	NA	NA	NA	NA	NA	NA	NA	NA	NA	NA	NA	NA	NA	NA	NA	NA	NA	Experimental - deliberate disease model	Yes	Treat	No	NA	NA	NA	NA	NA	NA	NA	NA	NA	NA	NA	NA	NA	NA	NA	NA	NA	NA	NA	NA	NA	NA
9631	3	2016	Iran	Rat	NA	NA	NA	NA	NA	NA	NA	NA	NA	NA	NA	NA	NA	NA	NA	NA	NA	NA	NA	Experimental - deliberate disease model	Yes	Treat	Yes	3	Yes	No (specify label if provided, e.g., &quot;turkish honey&quot;)	acacia honey	No	NA	No	NA	NA	NA	NA	NA	Yes	No (specify label if provided, e.g., &quot;turkish honey&quot;)	astragalus honey	No	NA	No	NA	NA	NA	NA
9950	3	2005	Egypt	NA	Mouse / Mice	NA	NA	NA	NA	NA	NA	NA	NA	NA	NA	NA	NA	NA	NA	NA	NA	NA	NA	Experimental - deliberate disease model	Yes	Prevent	Yes	2	Yes	No (specify label if provided, e.g., &quot;turkish honey&quot;)	Cariandrum sativum L. and Origanum	No	NA	No	NA	NA	NA	NA	NA	Yes	No (specify label if provided, e.g., &quot;turkish honey&quot;)	Nigella sativa L. a	No	NA	No	NA	NA	NA	NA
19334	3	2014	Malaysia	NA	NA	Rabbit	NA	NA	NA	NA	NA	NA	NA	NA	NA	NA	NA	NA	NA	NA	NA	NA	NA	Experimental - deliberate disease model	Yes	Prevent	No	NA	NA	NA	NA	NA	NA	NA	NA	NA	NA	NA	NA	NA	NA	NA	NA	NA	NA	NA	NA	NA	NA
19334	3	2014	Malaysia	NA	NA	Rabbit	NA	NA	NA	NA	NA	NA	NA	NA	NA	NA	NA	NA	NA	NA	NA	NA	NA	Experimental - deliberate disease model	Yes	Treat	No	NA	NA	NA	NA	NA	NA	NA	NA	NA	NA	NA	NA	NA	NA	NA	NA	NA	NA	NA	NA	NA	NA
19780	3	2015	Brazil	Rat	NA	NA	NA	NA	NA	NA	NA	NA	NA	NA	NA	NA	NA	NA	NA	NA	NA	NA	NA	Experimental - deliberate disease model	Yes	Treat	No	NA	NA	NA	NA	NA	NA	NA	NA	NA	NA	NA	NA	NA	NA	NA	NA	NA	NA	NA	NA	NA	NA
19780	3	2015	Brazil	Rat	NA	NA	NA	NA	NA	NA	NA	NA	NA	NA	NA	NA	NA	NA	NA	NA	NA	NA	NA	Experimental - deliberate disease model	Yes	Prevent	No	NA	NA	NA	NA	NA	NA	NA	NA	NA	NA	NA	NA	NA	NA	NA	NA	NA	NA	NA	NA	NA	NA
19929	3	2009	Egypt	Rat	NA	NA	NA	NA	NA	NA	NA	NA	NA	NA	NA	NA	NA	NA	NA	NA	NA	NA	NA	Experimental - deliberate disease model	Yes	Prevent	No	NA	NA	NA	NA	NA	NA	NA	NA	NA	NA	NA	NA	NA	NA	NA	NA	NA	NA	NA	NA	NA	NA
19929	3	2009	Egypt	Rat	NA	NA	NA	NA	NA	NA	NA	NA	NA	NA	NA	NA	NA	NA	NA	NA	NA	NA	NA	Experimental - deliberate disease model	Yes	Prevent	No	NA	NA	NA	NA	NA	NA	NA	NA	NA	NA	NA	NA	NA	NA	NA	NA	NA	NA	NA	NA	NA	NA
22071	3	2005	Croatia	NA	Mouse / Mice	NA	NA	NA	NA	NA	NA	NA	NA	NA	NA	NA	NA	NA	NA	NA	NA	NA	NA	Experimental - deliberate disease model	Yes	Treat	No	NA	NA	NA	NA	NA	NA	NA	NA	NA	NA	NA	NA	NA	NA	NA	NA	NA	NA	NA	NA	NA	NA
22071	3	2005	Croatia	NA	Mouse / Mice	NA	NA	NA	NA	NA	NA	NA	NA	NA	NA	NA	NA	NA	NA	NA	NA	NA	NA	Experimental - deliberate disease model	Yes	Prevent	No	NA	NA	NA	NA	NA	NA	NA	NA	NA	NA	NA	NA	NA	NA	NA	NA	NA	NA	NA	NA	NA	NA
37133	3	2019	Indonesia	Rat	NA	NA	NA	NA	NA	NA	NA	NA	NA	NA	NA	NA	NA	NA	NA	NA	NA	NA	NA	Experimental - deliberate disease model	Yes	Treat	Yes	2	Yes	No (specify label if provided, e.g., &quot;turkish honey&quot;)	NA	No	NA	Yes	NA	NA	NA	Other (specify)	glycerin	Yes	No (specify label if provided, e.g., &quot;turkish honey&quot;)	NA	No	NA	Yes	NA	NA	NA	NA
37133	3	2019	Indonesia	Rat	NA	NA	NA	NA	NA	NA	NA	NA	NA	NA	NA	NA	NA	NA	NA	NA	NA	NA	NA	Experimental - deliberate disease model	Yes	Treat	Yes	2	Yes	No (specify label if provided, e.g., &quot;turkish honey&quot;)	NA	No	NA	Yes	NA	NA	NA	Other (specify)	glycerin	Yes	No (specify label if provided, e.g., &quot;turkish honey&quot;)	NA	No	NA	Yes	NA	NA	NA	NA
38366	3	2017	Iraq	NA	Mouse / Mice	NA	NA	NA	NA	NA	NA	NA	NA	NA	NA	NA	NA	NA	NA	NA	NA	NA	NA	Experimental - deliberate disease model	Yes	Treat	Yes	3	Yes	No (specify label if provided, e.g., &quot;turkish honey&quot;)	sidr honey	No	NA	No	NA	NA	NA	NA	NA	Yes	No (specify label if provided, e.g., &quot;turkish honey&quot;)	magnetized water honey	No	NA	No	NA	NA	NA	NA
38366	3	2017	Iraq	NA	Mouse / Mice	NA	NA	NA	NA	NA	NA	NA	NA	NA	NA	NA	NA	NA	NA	NA	NA	NA	NA	Experimental - deliberate disease model	Yes	Prevent	Yes	3	Yes	No (specify label if provided, e.g., &quot;turkish honey&quot;)	sidr honey	No	NA	No	NA	NA	NA	NA	NA	Yes	No (specify label if provided, e.g., &quot;turkish honey&quot;)	magnetized water honey	No	NA	No	NA	NA	NA	NA
39010	3	2016	Iran	NA	Mouse / Mice	NA	NA	NA	NA	NA	NA	NA	NA	NA	NA	NA	NA	NA	NA	NA	NA	NA	NA	Experimental - deliberate disease model	Yes	Treat	No	NA	NA	NA	NA	NA	NA	NA	NA	NA	NA	NA	NA	NA	NA	NA	NA	NA	NA	NA	NA	NA	NA
39010	3	2016	Iran	NA	Mouse / Mice	NA	NA	NA	NA	NA	NA	NA	NA	NA	NA	NA	NA	NA	NA	NA	NA	NA	NA	Experimental - deliberate disease model	Yes	Prevent	No	NA	NA	NA	NA	NA	NA	NA	NA	NA	NA	NA	NA	NA	NA	NA	NA	NA	NA	NA	NA	NA	NA
39889	3	2015	Pakistan	NA	Mouse / Mice	NA	NA	NA	NA	NA	NA	NA	NA	NA	NA	NA	NA	NA	NA	NA	NA	NA	NA	Experimental - deliberate disease model	Yes	Treat	No	NA	NA	NA	NA	NA	NA	NA	NA	NA	NA	NA	NA	NA	NA	NA	NA	NA	NA	NA	NA	NA	NA
39889	3	2015	Pakistan	NA	Mouse / Mice	NA	NA	NA	NA	NA	NA	NA	NA	NA	NA	NA	NA	NA	NA	NA	NA	NA	NA	Experimental - deliberate disease model	Yes	Prevent	No	NA	NA	NA	NA	NA	NA	NA	NA	NA	NA	NA	NA	NA	NA	NA	NA	NA	NA	NA	NA	NA	NA
40562	3	2014	Nigeria	Rat	NA	NA	NA	NA	NA	NA	NA	NA	NA	NA	NA	NA	NA	NA	NA	NA	NA	NA	NA	Experimental - deliberate disease model	Yes	Treat	Yes	2	Yes	No (specify label if provided, e.g., &quot;turkish honey&quot;)	NA	No	NA	No	NA	NA	NA	NA	NA	Yes	No (specify label if provided, e.g., &quot;turkish honey&quot;)	NA	No	NA	Yes	NA	Drug	NA	NA
40562	3	2014	Nigeria	Rat	NA	NA	NA	NA	NA	NA	NA	NA	NA	NA	NA	NA	NA	NA	NA	NA	NA	NA	NA	Experimental - deliberate disease model	Yes	Treat	Yes	2	Yes	No (specify label if provided, e.g., &quot;turkish honey&quot;)	NA	No	NA	No	NA	NA	NA	NA	NA	Yes	No (specify label if provided, e.g., &quot;turkish honey&quot;)	NA	No	NA	Yes	NA	Drug	NA	NA
40588	3	2014	South Korea	Rat	NA	NA	NA	NA	NA	NA	NA	NA	NA	NA	NA	NA	NA	NA	NA	NA	NA	NA	NA	Experimental - deliberate disease model	Yes	Prevent	No	NA	NA	NA	NA	NA	NA	NA	NA	NA	NA	NA	NA	NA	NA	NA	NA	NA	NA	NA	NA	NA	NA
40588	3	2014	South Korea	Rat	NA	NA	NA	NA	NA	NA	NA	NA	NA	NA	NA	NA	NA	NA	NA	NA	NA	NA	NA	Experimental - deliberate disease model	Yes	Treat	No	NA	NA	NA	NA	NA	NA	NA	NA	NA	NA	NA	NA	NA	NA	NA	NA	NA	NA	NA	NA	NA	NA
41759	3	2011	USA	Rat	NA	NA	NA	NA	NA	NA	NA	NA	NA	NA	NA	NA	NA	NA	NA	NA	NA	NA	NA	Experimental - deliberate disease model	Yes	Treat	No	NA	NA	NA	NA	NA	NA	NA	NA	NA	NA	NA	NA	NA	NA	NA	NA	NA	NA	NA	NA	NA	NA
41759	3	2011	USA	Rat	NA	NA	NA	NA	NA	NA	NA	NA	NA	NA	NA	NA	NA	NA	NA	NA	NA	NA	NA	Experimental - deliberate disease model	Yes	Treat	No	NA	NA	NA	NA	NA	NA	NA	NA	NA	NA	NA	NA	NA	NA	NA	NA	NA	NA	NA	NA	NA	NA
41883	3	2011	Malaysia	Rat	NA	NA	NA	NA	NA	NA	NA	NA	NA	NA	NA	NA	NA	NA	NA	NA	NA	NA	NA	Experimental - deliberate disease model	Yes	Treat	No	NA	NA	NA	NA	NA	NA	NA	NA	NA	NA	NA	NA	NA	NA	NA	NA	NA	NA	NA	NA	NA	NA
41883	3	2011	Malaysia	Rat	NA	NA	NA	NA	NA	NA	NA	NA	NA	NA	NA	NA	NA	NA	NA	NA	NA	NA	NA	Experimental - deliberate disease model	Yes	Treat	No	NA	NA	NA	NA	NA	NA	NA	NA	NA	NA	NA	NA	NA	NA	NA	NA	NA	NA	NA	NA	NA	NA
41950	3	2011	Nigeria	NA	Mouse / Mice	NA	NA	NA	NA	NA	NA	NA	NA	NA	NA	NA	NA	NA	NA	NA	NA	NA	NA	Experimental - deliberate disease model	Yes	Treat	No	NA	NA	NA	NA	NA	NA	NA	NA	NA	NA	NA	NA	NA	NA	NA	NA	NA	NA	NA	NA	NA	NA
41950	3	2011	Nigeria	NA	Mouse / Mice	NA	NA	NA	NA	NA	NA	NA	NA	NA	NA	NA	NA	NA	NA	NA	NA	NA	NA	Experimental - deliberate disease model	Yes	Prevent	No	NA	NA	NA	NA	NA	NA	NA	NA	NA	NA	NA	NA	NA	NA	NA	NA	NA	NA	NA	NA	NA	NA
41950	3	2011	Nigeria	NA	Mouse / Mice	NA	NA	NA	NA	NA	NA	NA	NA	NA	NA	NA	NA	NA	NA	NA	NA	NA	NA	Experimental - deliberate disease model	Yes	Prevent	No	NA	NA	NA	NA	NA	NA	NA	NA	NA	NA	NA	NA	NA	NA	NA	NA	NA	NA	NA	NA	NA	NA
42037	3	2010	Malaysia	Rat	NA	NA	NA	NA	NA	NA	NA	NA	NA	NA	NA	NA	NA	NA	NA	NA	NA	NA	NA	Experimental - deliberate disease model	Yes	Prevent	Yes	3	Yes	No (specify label if provided, e.g., &quot;turkish honey&quot;)	gelam honey	No	NA	No	NA	NA	NA	NA	NA	No	NA	NA	Yes (specify which derivative it was, e.g., chrysin)	honey ethyl acetate extract	No	NA	NA	NA	NA
42037	3	2010	Malaysia	Rat	NA	NA	NA	NA	NA	NA	NA	NA	NA	NA	NA	NA	NA	NA	NA	NA	NA	NA	NA	Experimental - deliberate disease model	Yes	Prevent	Yes	3	Yes	No (specify label if provided, e.g., &quot;turkish honey&quot;)	gelam honey	No	NA	No	NA	NA	NA	NA	NA	No	NA	NA	Yes (specify which derivative it was, e.g., chrysin)	honey ethyl acetate extract	No	NA	NA	NA	NA
42225	3	2010	Pakistan	Rat	NA	NA	NA	NA	NA	NA	NA	NA	NA	NA	NA	NA	NA	NA	NA	NA	NA	NA	NA	Experimental - deliberate disease model	Yes	Treat	No	NA	NA	NA	NA	NA	NA	NA	NA	NA	NA	NA	NA	NA	NA	NA	NA	NA	NA	NA	NA	NA	NA
42225	3	2010	Pakistan	Rat	NA	NA	NA	NA	NA	NA	NA	NA	NA	NA	NA	NA	NA	NA	NA	NA	NA	NA	NA	Experimental - deliberate disease model	Yes	Treat	No	NA	NA	NA	NA	NA	NA	NA	NA	NA	NA	NA	NA	NA	NA	NA	NA	NA	NA	NA	NA	NA	NA
42225	3	2010	Pakistan	Rat	NA	NA	NA	NA	NA	NA	NA	NA	NA	NA	NA	NA	NA	NA	NA	NA	NA	NA	NA	Experimental - deliberate disease model	Yes	Treat	No	NA	NA	NA	NA	NA	NA	NA	NA	NA	NA	NA	NA	NA	NA	NA	NA	NA	NA	NA	NA	NA	NA
42247	3	2010	Turkey	NA	Mouse / Mice	NA	NA	NA	NA	NA	NA	NA	NA	NA	NA	NA	NA	NA	NA	NA	NA	NA	NA	Experimental - deliberate disease model	Yes	Prevent	No	NA	NA	NA	NA	NA	NA	NA	NA	NA	NA	NA	NA	NA	NA	NA	NA	NA	NA	NA	NA	NA	NA
42247	3	2010	Turkey	NA	Mouse / Mice	NA	NA	NA	NA	NA	NA	NA	NA	NA	NA	NA	NA	NA	NA	NA	NA	NA	NA	Experimental - deliberate disease model	Yes	Prevent	No	NA	NA	NA	NA	NA	NA	NA	NA	NA	NA	NA	NA	NA	NA	NA	NA	NA	NA	NA	NA	NA	NA
42873	3	2008	Egypt	Rat	NA	NA	NA	NA	NA	NA	NA	NA	NA	NA	NA	NA	NA	NA	NA	NA	NA	NA	NA	Experimental - deliberate disease model	Yes	Prevent	No	NA	NA	NA	NA	NA	NA	NA	NA	NA	NA	NA	NA	NA	NA	NA	NA	NA	NA	NA	NA	NA	NA
42873	3	2008	Egypt	Rat	NA	NA	NA	NA	NA	NA	NA	NA	NA	NA	NA	NA	NA	NA	NA	NA	NA	NA	NA	Experimental - deliberate disease model	Yes	Treat	No	NA	NA	NA	NA	NA	NA	NA	NA	NA	NA	NA	NA	NA	NA	NA	NA	NA	NA	NA	NA	NA	NA
42873	3	2008	Egypt	Rat	NA	NA	NA	NA	NA	NA	NA	NA	NA	NA	NA	NA	NA	NA	NA	NA	NA	NA	NA	Experimental - deliberate disease model	Yes	Prevent	No	NA	NA	NA	NA	NA	NA	NA	NA	NA	NA	NA	NA	NA	NA	NA	NA	NA	NA	NA	NA	NA	NA
42976	3	2007	India	Rat	NA	NA	NA	NA	NA	NA	NA	NA	NA	NA	NA	NA	NA	NA	NA	NA	NA	NA	NA	Experimental - deliberate disease model	Yes	Prevent	No	NA	NA	NA	NA	NA	NA	NA	NA	NA	NA	NA	NA	NA	NA	NA	NA	NA	NA	NA	NA	NA	NA
42976	3	2007	India	Rat	NA	NA	NA	NA	NA	NA	NA	NA	NA	NA	NA	NA	NA	NA	NA	NA	NA	NA	NA	Experimental - deliberate disease model	Yes	Prevent	No	NA	NA	NA	NA	NA	NA	NA	NA	NA	NA	NA	NA	NA	NA	NA	NA	NA	NA	NA	NA	NA	NA
42976	3	2007	India	Rat	NA	NA	NA	NA	NA	NA	NA	NA	NA	NA	NA	NA	NA	NA	NA	NA	NA	NA	NA	Experimental - deliberate disease model	Yes	Treat	No	NA	NA	NA	NA	NA	NA	NA	NA	NA	NA	NA	NA	NA	NA	NA	NA	NA	NA	NA	NA	NA	NA
43008	3	2007	Croatia	Rat	Mouse / Mice	NA	NA	NA	NA	NA	NA	NA	NA	NA	NA	NA	NA	NA	NA	NA	NA	NA	NA	Experimental - deliberate disease model	Yes	Treat	No	NA	NA	NA	NA	NA	NA	NA	NA	NA	NA	NA	NA	NA	NA	NA	NA	NA	NA	NA	NA	NA	NA
43008	3	2007	Croatia	Rat	Mouse / Mice	NA	NA	NA	NA	NA	NA	NA	NA	NA	NA	NA	NA	NA	NA	NA	NA	NA	NA	Experimental - deliberate disease model	Yes	Prevent	No	NA	NA	NA	NA	NA	NA	NA	NA	NA	NA	NA	NA	NA	NA	NA	NA	NA	NA	NA	NA	NA	NA
43025	3	2007	Iran	NA	NA	NA	NA	NA	Dog	NA	NA	NA	NA	NA	NA	NA	NA	NA	NA	NA	NA	NA	NA	Experimental - deliberate disease model	Yes	Treat	No	NA	NA	NA	NA	NA	NA	NA	NA	NA	NA	NA	NA	NA	NA	NA	NA	NA	NA	NA	NA	NA	NA
43025	3	2007	Iran	NA	NA	NA	NA	NA	Dog	NA	NA	NA	NA	NA	NA	NA	NA	NA	NA	NA	NA	NA	NA	Experimental - deliberate disease model	Yes	Prevent	No	NA	NA	NA	NA	NA	NA	NA	NA	NA	NA	NA	NA	NA	NA	NA	NA	NA	NA	NA	NA	NA	NA
43114	3	2006	Nigeria	Rat	NA	NA	NA	NA	NA	NA	NA	NA	NA	NA	NA	NA	NA	NA	NA	NA	NA	NA	NA	Experimental - deliberate disease model	Yes	Treat	No	NA	NA	NA	NA	NA	NA	NA	NA	NA	NA	NA	NA	NA	NA	NA	NA	NA	NA	NA	NA	NA	NA
43114	3	2006	Nigeria	Rat	NA	NA	NA	NA	NA	NA	NA	NA	NA	NA	NA	NA	NA	NA	NA	NA	NA	NA	NA	Experimental - deliberate disease model	Yes	Treat	No	NA	NA	NA	NA	NA	NA	NA	NA	NA	NA	NA	NA	NA	NA	NA	NA	NA	NA	NA	NA	NA	NA
43114	3	2006	Nigeria	Rat	NA	NA	NA	NA	NA	NA	NA	NA	NA	NA	NA	NA	NA	NA	NA	NA	NA	NA	NA	Experimental - deliberate disease model	Yes	Prevent	No	NA	NA	NA	NA	NA	NA	NA	NA	NA	NA	NA	NA	NA	NA	NA	NA	NA	NA	NA	NA	NA	NA
43454	3	2004	United Arab Emirates	Rat	NA	NA	NA	NA	NA	NA	NA	NA	NA	NA	NA	NA	NA	NA	NA	NA	NA	NA	NA	Experimental - deliberate disease model	Yes	Treat	No	NA	NA	NA	NA	NA	NA	NA	NA	NA	NA	NA	NA	NA	NA	NA	NA	NA	NA	NA	NA	NA	NA
43454	3	2004	United Arab Emirates	NA	Mouse / Mice	NA	NA	NA	NA	NA	NA	NA	NA	NA	NA	NA	NA	NA	NA	NA	NA	NA	NA	Experimental - deliberate disease model	Yes	Treat	No	NA	NA	NA	NA	NA	NA	NA	NA	NA	NA	NA	NA	NA	NA	NA	NA	NA	NA	NA	NA	NA	NA
44441	3	1993	India	Rat	NA	NA	NA	NA	NA	NA	NA	NA	NA	NA	NA	NA	NA	NA	NA	NA	NA	NA	NA	Experimental - deliberate disease model	Yes	Treat	No	NA	NA	NA	NA	NA	NA	NA	NA	NA	NA	NA	NA	NA	NA	NA	NA	NA	NA	NA	NA	NA	NA
44441	3	1993	India	Rat	NA	NA	NA	NA	NA	NA	NA	NA	NA	NA	NA	NA	NA	NA	NA	NA	NA	NA	NA	Experimental - deliberate disease model	Yes	Treat	No	NA	NA	NA	NA	NA	NA	NA	NA	NA	NA	NA	NA	NA	NA	NA	NA	NA	NA	NA	NA	NA	NA
44481	3	1992	India	Rat	NA	NA	NA	NA	NA	NA	NA	NA	NA	NA	NA	NA	NA	NA	NA	NA	NA	NA	NA	Experimental - deliberate disease model	Yes	Treat	No	NA	NA	NA	NA	NA	NA	NA	NA	NA	NA	NA	NA	NA	NA	NA	NA	NA	NA	NA	NA	NA	NA
44481	3	1992	India	Rat	NA	NA	NA	NA	NA	NA	NA	NA	NA	NA	NA	NA	NA	NA	NA	NA	NA	NA	NA	Experimental - deliberate disease model	Yes	Treat	No	NA	NA	NA	NA	NA	NA	NA	NA	NA	NA	NA	NA	NA	NA	NA	NA	NA	NA	NA	NA	NA	NA
44562	3	1991	Saudi Arabia	Rat	NA	NA	NA	NA	NA	NA	NA	NA	NA	NA	NA	NA	NA	NA	NA	NA	NA	NA	NA	Experimental - deliberate disease model	Yes	Prevent	No	NA	NA	NA	NA	NA	NA	NA	NA	NA	NA	NA	NA	NA	NA	NA	NA	NA	NA	NA	NA	NA	NA
44562	3	1991	Saudi Arabia	Rat	NA	NA	NA	NA	NA	NA	NA	NA	NA	NA	NA	NA	NA	NA	NA	NA	NA	NA	NA	Experimental - deliberate disease model	Yes	Treat	No	NA	NA	NA	NA	NA	NA	NA	NA	NA	NA	NA	NA	NA	NA	NA	NA	NA	NA	NA	NA	NA	NA
44988	3	2019	Bangladesh	NA	Mouse / Mice	NA	NA	NA	NA	NA	NA	NA	NA	NA	NA	NA	NA	NA	NA	NA	NA	NA	NA	Experimental - deliberate disease model	Yes	Prevent	No	NA	NA	NA	NA	NA	NA	NA	NA	NA	NA	NA	NA	NA	NA	NA	NA	NA	NA	NA	NA	NA	NA
44988	3	2019	Bangladesh	NA	Mouse / Mice	NA	NA	NA	NA	NA	NA	NA	NA	NA	NA	NA	NA	NA	NA	NA	NA	NA	NA	Experimental - deliberate disease model	Yes	Prevent	No	NA	NA	NA	NA	NA	NA	NA	NA	NA	NA	NA	NA	NA	NA	NA	NA	NA	NA	NA	NA	NA	NA
45566	3	2018	Iran	Rat	NA	NA	NA	NA	NA	NA	NA	NA	NA	NA	NA	NA	NA	NA	NA	NA	NA	NA	NA	Experimental - deliberate disease model	Yes	Prevent	No	NA	NA	NA	NA	NA	NA	NA	NA	NA	NA	NA	NA	NA	NA	NA	NA	NA	NA	NA	NA	NA	NA
45566	3	2018	Iran	Rat	NA	NA	NA	NA	NA	NA	NA	NA	NA	NA	NA	NA	NA	NA	NA	NA	NA	NA	NA	Experimental - deliberate disease model	Yes	Prevent	No	NA	NA	NA	NA	NA	NA	NA	NA	NA	NA	NA	NA	NA	NA	NA	NA	NA	NA	NA	NA	NA	NA
46114	3	2003	Croatia	Rat	Mouse / Mice	NA	NA	NA	NA	NA	NA	NA	NA	NA	NA	NA	NA	NA	NA	NA	NA	NA	NA	Experimental - deliberate disease model	Yes	Prevent	No	NA	NA	NA	NA	NA	NA	NA	NA	NA	NA	NA	NA	NA	NA	NA	NA	NA	NA	NA	NA	NA	NA
46114	3	2003	Croatia	Rat	Mouse / Mice	NA	NA	NA	NA	NA	NA	NA	NA	NA	NA	NA	NA	NA	NA	NA	NA	NA	NA	Experimental - deliberate disease model	Yes	Treat	No	NA	NA	NA	NA	NA	NA	NA	NA	NA	NA	NA	NA	NA	NA	NA	NA	NA	NA	NA	NA	NA	NA
46209	3	2003	Japan	NA	Mouse / Mice	NA	NA	NA	NA	NA	NA	NA	NA	NA	NA	NA	NA	NA	NA	NA	NA	NA	NA	Experimental - deliberate disease model	Yes	Treat	No	NA	NA	NA	NA	NA	NA	NA	NA	NA	NA	NA	NA	NA	NA	NA	NA	NA	NA	NA	NA	NA	NA
46209	3	2003	Japan	NA	Mouse / Mice	NA	NA	NA	NA	NA	NA	NA	NA	NA	NA	NA	NA	NA	NA	NA	NA	NA	NA	Experimental - deliberate disease model	Yes	Treat	No	NA	NA	NA	NA	NA	NA	NA	NA	NA	NA	NA	NA	NA	NA	NA	NA	NA	NA	NA	NA	NA	NA
46219	3	2002	Saudi Arabia	Rat	NA	NA	NA	NA	NA	NA	NA	NA	NA	NA	NA	NA	NA	NA	NA	NA	NA	NA	NA	Experimental - deliberate disease model	Yes	Prevent	No	NA	NA	NA	NA	NA	NA	NA	NA	NA	NA	NA	NA	NA	NA	NA	NA	NA	NA	NA	NA	NA	NA
46219	3	2002	Saudi Arabia	Rat	NA	NA	NA	NA	NA	NA	NA	NA	NA	NA	NA	NA	NA	NA	NA	NA	NA	NA	NA	Experimental - deliberate disease model	Yes	Prevent	No	NA	NA	NA	NA	NA	NA	NA	NA	NA	NA	NA	NA	NA	NA	NA	NA	NA	NA	NA	NA	NA	NA
47657	3	2010	India	NA	Mouse / Mice	NA	NA	NA	NA	NA	NA	NA	NA	NA	NA	NA	NA	NA	NA	NA	NA	NA	NA	Experimental - deliberate disease model	Yes	Treat	Yes	2	Yes	No (specify label if provided, e.g., &quot;turkish honey&quot;)	NA	No	NA	No	NA	NA	NA	NA	NA	No	NA	NA	Yes (specify which derivative it was, e.g., chrysin)	eugenol	No	NA	NA	NA	NA
47657	3	2010	India	NA	Mouse / Mice	NA	NA	NA	NA	NA	NA	NA	NA	NA	NA	NA	NA	NA	NA	NA	NA	NA	NA	Experimental - deliberate disease model	Yes	Prevent	Yes	2	Yes	No (specify label if provided, e.g., &quot;turkish honey&quot;)	NA	No	NA	No	NA	NA	NA	NA	NA	No	NA	NA	Yes (specify which derivative it was, e.g., chrysin)	eugenol	No	NA	NA	NA	NA
49797	3	2011	Nigeria	Rat	NA	NA	NA	NA	NA	NA	NA	NA	NA	NA	NA	NA	NA	NA	NA	NA	NA	NA	NA	Experimental - deliberate disease model	Yes	Prevent	No	NA	NA	NA	NA	NA	NA	NA	NA	NA	NA	NA	NA	NA	NA	NA	NA	NA	NA	NA	NA	NA	NA
49797	3	2011	Nigeria	Rat	NA	NA	NA	NA	NA	NA	NA	NA	NA	NA	NA	NA	NA	NA	NA	NA	NA	NA	NA	Experimental - deliberate disease model	Yes	Prevent	No	NA	NA	NA	NA	NA	NA	NA	NA	NA	NA	NA	NA	NA	NA	NA	NA	NA	NA	NA	NA	NA	NA
9545	3	2009	Egypt	Rat	NA	NA	NA	NA	NA	NA	NA	NA	NA	NA	NA	NA	NA	NA	NA	NA	NA	NA	NA	Experimental - deliberate disease model	Yes	Treat	No	NA	NA	NA	NA	NA	NA	NA	NA	NA	NA	NA	NA	NA	NA	NA	NA	NA	NA	NA	NA	NA	NA
9545	3	2009	Egypt	Rat	NA	NA	NA	NA	NA	NA	NA	NA	NA	NA	NA	NA	NA	NA	NA	NA	NA	NA	NA	Experimental - deliberate disease model	Yes	Prevent	No	NA	NA	NA	NA	NA	NA	NA	NA	NA	NA	NA	NA	NA	NA	NA	NA	NA	NA	NA	NA	NA	NA
9256	3	2011	India	NA	NA	NA	NA	NA	NA	NA	Cattle	NA	Buffalo	NA	NA	NA	NA	NA	NA	NA	NA	NA	NA	Case report / case series	No	Treat	No	NA	NA	NA	NA	NA	NA	NA	NA	NA	NA	NA	NA	NA	NA	NA	NA	NA	NA	NA	NA	NA	NA
9257	3	2017	Nepal	NA	NA	NA	NA	NA	Dog	NA	NA	NA	NA	NA	NA	NA	NA	NA	NA	NA	NA	NA	NA	Case report / case series	No	Treat	No	NA	NA	NA	NA	NA	NA	NA	NA	NA	NA	NA	NA	NA	NA	NA	NA	NA	NA	NA	NA	NA	NA
9262	3	2018	Slovenia	NA	NA	NA	NA	Cat	NA	NA	NA	NA	NA	NA	NA	NA	NA	NA	NA	NA	NA	NA	NA	Case report / case series	No	Treat	No	NA	NA	NA	NA	NA	NA	NA	NA	NA	NA	NA	NA	NA	NA	NA	NA	NA	NA	NA	NA	NA	NA
9289	3	2011	Egypt	NA	NA	NA	NA	NA	NA	Horse	NA	NA	NA	Donkey	NA	NA	NA	NA	NA	NA	NA	NA	NA	Case report / case series	No	Treat	No	NA	NA	NA	NA	NA	NA	NA	NA	NA	NA	NA	NA	NA	NA	NA	NA	NA	NA	NA	NA	NA	NA
9317	3	2017	Nigeria	NA	NA	NA	NA	NA	Dog	NA	NA	NA	NA	NA	NA	NA	NA	NA	NA	NA	NA	NA	NA	Case report / case series	No	Treat	No	NA	NA	NA	NA	NA	NA	NA	NA	NA	NA	NA	NA	NA	NA	NA	NA	NA	NA	NA	NA	NA	NA
9322	3	2016	Nigeria	NA	NA	NA	Pigs	NA	NA	NA	NA	NA	NA	NA	NA	NA	NA	NA	NA	NA	NA	NA	NA	Case report / case series	No	Treat	No	NA	NA	NA	NA	NA	NA	NA	NA	NA	NA	NA	NA	NA	NA	NA	NA	NA	NA	NA	NA	NA	NA
9335	3	2016	Nigeria	NA	NA	NA	NA	NA	Dog	NA	NA	NA	NA	NA	NA	NA	NA	NA	NA	NA	NA	NA	NA	Case report / case series	No	Treat	Yes	2	Yes	No (specify label if provided, e.g., &quot;turkish honey&quot;)	NA	No	NA	Yes	Drug	NA	NA	NA	NA	Yes	No (specify label if provided, e.g., &quot;turkish honey&quot;)	NA	No	NA	No	NA	NA	NA	NA
9348	3	2017	Nigeria	NA	NA	NA	NA	NA	Dog	NA	NA	NA	NA	NA	NA	NA	NA	NA	NA	NA	NA	NA	NA	Case report / case series	No	Treat	No	NA	NA	NA	NA	NA	NA	NA	NA	NA	NA	NA	NA	NA	NA	NA	NA	NA	NA	NA	NA	NA	NA
9368	3	2018	India	NA	NA	NA	NA	NA	NA	NA	Cattle	NA	NA	NA	NA	NA	NA	NA	NA	NA	NA	NA	NA	Case report / case series	No	Treat	No	NA	NA	NA	NA	NA	NA	NA	NA	NA	NA	NA	NA	NA	NA	NA	NA	NA	NA	NA	NA	NA	NA
19260	3	2016	Sweden	NA	NA	NA	NA	NA	NA	Horse	NA	NA	NA	NA	NA	NA	NA	NA	NA	NA	NA	NA	NA	Case report / case series	No	Treat	No	NA	NA	NA	NA	NA	NA	NA	NA	NA	NA	NA	NA	NA	NA	NA	NA	NA	NA	NA	NA	NA	NA
19754	3	2016	Portugal	NA	NA	NA	NA	NA	Dog	NA	NA	NA	NA	NA	NA	NA	NA	NA	NA	NA	NA	NA	NA	Case report / case series	No	Treat	No	NA	NA	NA	NA	NA	NA	NA	NA	NA	NA	NA	NA	NA	NA	NA	NA	NA	NA	NA	NA	NA	NA
21957	3	2013	Algeria	NA	NA	NA	NA	NA	NA	NA	Cattle	NA	NA	NA	NA	NA	NA	NA	NA	NA	NA	NA	NA	Case report / case series	No	Treat	No	NA	NA	NA	NA	NA	NA	NA	NA	NA	NA	NA	NA	NA	NA	NA	NA	NA	NA	NA	NA	NA	NA
21991	3	2014	Algeria	NA	NA	NA	NA	NA	NA	Horse	NA	NA	NA	NA	NA	NA	NA	NA	NA	NA	NA	NA	NA	Case report / case series	No	Treat	No	NA	NA	NA	NA	NA	NA	NA	NA	NA	NA	NA	NA	NA	NA	NA	NA	NA	NA	NA	NA	NA	NA
22039	3	2005	USA	NA	NA	NA	NA	NA	NA	NA	NA	NA	NA	NA	NA	NA	NA	NA	NA	NA	Macaque	NA	NA	Case report / case series	No	Treat	No	NA	NA	NA	NA	NA	NA	NA	NA	NA	NA	NA	NA	NA	NA	NA	NA	NA	NA	NA	NA	NA	NA
38177	3	2018	Australia	NA	NA	NA	NA	NA	NA	Horse	NA	NA	NA	NA	NA	NA	NA	NA	NA	NA	NA	NA	NA	Case report / case series	No	Treat	Yes	2	Yes	No (specify label if provided, e.g., &quot;turkish honey&quot;)	NA	No	NA	Yes	Drug	NA	NA	Other (specify)	aloe vera gel, SSDcream, acticoat dressing, sorbolene, zinc oxide cream, body compression suit	Yes	No (specify label if provided, e.g., &quot;turkish honey&quot;)	NA	No	NA	Yes	NA	Drug	NA	NA
38956	3	2017	Germany	NA	NA	NA	NA	NA	NA	NA	NA	NA	NA	NA	NA	NA	NA	NA	NA	NA	NA	NA	Tortoise	Case report / case series	No	Treat	No	NA	NA	NA	NA	NA	NA	NA	NA	NA	NA	NA	NA	NA	NA	NA	NA	NA	NA	NA	NA	NA	NA
39039	3	2016	USA	NA	NA	NA	NA	NA	Dog	NA	NA	NA	NA	NA	NA	NA	NA	NA	NA	NA	NA	NA	NA	Case report / case series	No	Treat	No	NA	NA	NA	NA	NA	NA	NA	NA	NA	NA	NA	NA	NA	NA	NA	NA	NA	NA	NA	NA	NA	NA
39374	3	2016	India	NA	NA	NA	NA	NA	NA	NA	Cattle	NA	NA	NA	NA	NA	NA	NA	NA	NA	NA	NA	NA	Case report / case series	No	Treat	No	NA	NA	NA	NA	NA	NA	NA	NA	NA	NA	NA	NA	NA	NA	NA	NA	NA	NA	NA	NA	NA	NA
40151	3	2015	USA	NA	NA	NA	NA	NA	Dog	NA	NA	NA	NA	NA	NA	NA	NA	NA	NA	NA	NA	NA	NA	Case report / case series	No	Treat	No	NA	NA	NA	NA	NA	NA	NA	NA	NA	NA	NA	NA	NA	NA	NA	NA	NA	NA	NA	NA	NA	NA
41036	3	2013	Canada	NA	NA	NA	NA	Cat	NA	NA	NA	NA	NA	NA	NA	NA	NA	NA	NA	NA	NA	NA	NA	Case report / case series	No	Treat	No	NA	NA	NA	NA	NA	NA	NA	NA	NA	NA	NA	NA	NA	NA	NA	NA	NA	NA	NA	NA	NA	NA
41636	3	2012	New Zealand	NA	NA	NA	NA	NA	NA	Horse	NA	NA	NA	NA	NA	NA	NA	NA	NA	NA	NA	NA	NA	Case report / case series	No	Treat	No	NA	NA	NA	NA	NA	NA	NA	NA	NA	NA	NA	NA	NA	NA	NA	NA	NA	NA	NA	NA	NA	NA
41949	3	2011	Kenya	NA	NA	NA	NA	NA	NA	NA	Cattle	NA	NA	NA	NA	NA	NA	NA	NA	NA	NA	NA	NA	Case report / case series	No	Treat	No	NA	NA	NA	NA	NA	NA	NA	NA	NA	NA	NA	NA	NA	NA	NA	NA	NA	NA	NA	NA	NA	NA
45662	3	2018	Brazil	NA	NA	NA	NA	Cat	NA	NA	NA	NA	NA	NA	NA	NA	NA	NA	NA	NA	NA	NA	NA	Case report / case series	No	Treat	No	NA	NA	NA	NA	NA	NA	NA	NA	NA	NA	NA	NA	NA	NA	NA	NA	NA	NA	NA	NA	NA	NA
9255	3	2017	Nigeria	NA	NA	NA	NA	NA	NA	NA	NA	Chicken	NA	NA	NA	NA	NA	NA	NA	NA	NA	NA	NA	Experiment - natural exposure to outcome or exposure	No	Treat	No	NA	NA	NA	NA	NA	NA	NA	NA	NA	NA	NA	NA	NA	NA	NA	NA	NA	NA	NA	NA	NA	NA
9305	3	2011	Egypt	NA	NA	NA	NA	NA	NA	Horse	NA	NA	NA	Donkey	NA	Mule	NA	NA	NA	NA	NA	NA	NA	Experiment - natural exposure to outcome or exposure	No	Treat	Yes	2	Yes	No (specify label if provided, e.g., &quot;turkish honey&quot;)	NA	No	NA	Yes	NA	Other bee products (Specify, e.g., bee venom, propolis, bee pollen, royal jelly, beeswax, bee bread)	propolis	NA	NA	Yes	No (specify label if provided, e.g., &quot;turkish honey&quot;)	NA	No	NA	No	NA	NA	NA	NA
9363	3	2018	Pakistan	NA	NA	NA	NA	NA	NA	NA	NA	Chicken	NA	NA	NA	NA	NA	NA	NA	NA	NA	NA	NA	Experiment - natural exposure to outcome or exposure	No	Prevent	No	NA	NA	NA	NA	NA	NA	NA	NA	NA	NA	NA	NA	NA	NA	NA	NA	NA	NA	NA	NA	NA	NA
19409	3	2012	Germany	NA	NA	NA	NA	NA	NA	NA	Cattle	NA	NA	NA	NA	NA	NA	NA	NA	NA	NA	NA	NA	Experiment - natural exposure to outcome or exposure	No	Treat	No	NA	NA	NA	NA	NA	NA	NA	NA	NA	NA	NA	NA	NA	NA	NA	NA	NA	NA	NA	NA	NA	NA
19745	3	2016	Belgium	NA	NA	NA	NA	NA	Dog	NA	NA	NA	NA	NA	NA	NA	NA	NA	NA	NA	NA	NA	NA	Experiment - natural exposure to outcome or exposure	No	Prevent	No	NA	NA	NA	NA	NA	NA	NA	NA	NA	NA	NA	NA	NA	NA	NA	NA	NA	NA	NA	NA	NA	NA
37172	3	2019	Turkey	NA	NA	NA	NA	Cat	NA	NA	NA	NA	NA	NA	NA	NA	NA	NA	NA	NA	NA	NA	NA	Experiment - natural exposure to outcome or exposure	No	Treat	No	NA	NA	NA	NA	NA	NA	NA	NA	NA	NA	NA	NA	NA	NA	NA	NA	NA	NA	NA	NA	NA	NA
41983	3	2011	Egypt	NA	NA	NA	NA	NA	NA	NA	Cattle	NA	NA	NA	NA	NA	NA	NA	NA	NA	NA	NA	NA	Experiment - natural exposure to outcome or exposure	No	Treat	Yes	2	Yes	No (specify label if provided, e.g., &quot;turkish honey&quot;)	fennel honey	No	NA	No	NA	NA	NA	NA	NA	Yes	No (specify label if provided, e.g., &quot;turkish honey&quot;)	fennel honey	No	NA	Yes	NA	Drug	NA	NA
45044	3	2019	Israel	NA	NA	NA	NA	NA	NA	Horse	NA	NA	NA	NA	NA	NA	NA	NA	NA	NA	NA	NA	NA	Experiment - natural exposure to outcome or exposure	No	Treat	No	NA	NA	NA	NA	NA	NA	NA	NA	NA	NA	NA	NA	NA	NA	NA	NA	NA	NA	NA	NA	NA	NA
9261	3	2013	Egypt	NA	NA	NA	NA	NA	Dog	NA	NA	NA	NA	NA	NA	NA	NA	NA	NA	NA	NA	NA	NA	Experimental - deliberate disease model	No	Treat	No	NA	NA	NA	NA	NA	NA	NA	NA	NA	NA	NA	NA	NA	NA	NA	NA	NA	NA	NA	NA	NA	NA
9267	3	2006	Iran	NA	NA	NA	NA	NA	Dog	NA	NA	NA	NA	NA	NA	NA	NA	NA	NA	NA	NA	NA	NA	Experimental - deliberate disease model	No	Prevent	No	NA	NA	NA	NA	NA	NA	NA	NA	NA	NA	NA	NA	NA	NA	NA	NA	NA	NA	NA	NA	NA	NA
9269	3	2017	Australia	NA	NA	NA	NA	NA	NA	Horse	NA	NA	NA	NA	NA	NA	NA	NA	NA	NA	NA	NA	NA	Experimental - deliberate disease model	No	Treat	Yes	3	Yes	No (specify label if provided, e.g., &quot;turkish honey&quot;)	generic multifloral honey	No	NA	No	NA	NA	NA	NA	NA	Yes	Yes (specify product name)	UMF5 (Honey New Zealand UMF5 + Manuka Honey)	No	NA	No	NA	NA	NA	NA
9278	3	2016	Jordan	NA	NA	NA	NA	NA	Dog	NA	NA	NA	NA	NA	NA	NA	NA	NA	NA	NA	NA	NA	NA	Experimental - deliberate disease model	No	Treat	No	NA	NA	NA	NA	NA	NA	NA	NA	NA	NA	NA	NA	NA	NA	NA	NA	NA	NA	NA	NA	NA	NA
9289	3	2011	Egypt	NA	NA	NA	NA	NA	NA	NA	NA	NA	NA	Donkey	NA	NA	NA	NA	NA	NA	NA	NA	NA	Experimental - deliberate disease model	No	Treat	Yes	2	Yes	No (specify label if provided, e.g., &quot;turkish honey&quot;)	NA	No	NA	No	NA	NA	NA	NA	NA	Yes	No (specify label if provided, e.g., &quot;turkish honey&quot;)	NA	No	NA	Yes	NA	NA	NA	NA
9299	3	2005	India	NA	NA	NA	NA	NA	NA	NA	NA	NA	NA	NA	Goat	NA	NA	NA	NA	NA	NA	NA	NA	Experimental - deliberate disease model	No	Treat	No	NA	NA	NA	NA	NA	NA	NA	NA	NA	NA	NA	NA	NA	NA	NA	NA	NA	NA	NA	NA	NA	NA
9305	3	2011	Egypt	NA	NA	NA	NA	NA	NA	NA	NA	NA	NA	Donkey	NA	NA	NA	NA	NA	NA	NA	NA	NA	Experimental - deliberate disease model	No	Treat	Yes	2	Yes	No (specify label if provided, e.g., &quot;turkish honey&quot;)	NA	No	NA	Yes	NA	Other bee products (Specify, e.g., bee venom, propolis, bee pollen, royal jelly, beeswax, bee bread)	propolis	NA	NA	Yes	No (specify label if provided, e.g., &quot;turkish honey&quot;)	NA	No	NA	No	NA	NA	NA	NA
9385	3	2015	Nigeria	NA	NA	NA	NA	NA	NA	NA	NA	Chicken	NA	NA	NA	NA	NA	NA	NA	NA	NA	NA	NA	Experimental - deliberate disease model	No	Prevent	No	NA	NA	NA	NA	NA	NA	NA	NA	NA	NA	NA	NA	NA	NA	NA	NA	NA	NA	NA	NA	NA	NA
9409	3	2019	Indonesia	NA	NA	NA	NA	NA	NA	NA	NA	NA	NA	NA	NA	NA	Fish	NA	NA	NA	NA	NA	NA	Experimental - deliberate disease model	No	Prevent	No	NA	NA	NA	NA	NA	NA	NA	NA	NA	NA	NA	NA	NA	NA	NA	NA	NA	NA	NA	NA	NA	NA
9576	3	2016	Iran	NA	NA	NA	NA	NA	NA	NA	NA	NA	NA	NA	NA	NA	NA	Quail	NA	NA	NA	NA	NA	Experimental - deliberate disease model	No	Prevent	No	NA	NA	NA	NA	NA	NA	NA	NA	NA	NA	NA	NA	NA	NA	NA	NA	NA	NA	NA	NA	NA	NA
10093	3	2012	Brazil	NA	NA	NA	NA	Cat	NA	NA	NA	NA	NA	NA	NA	NA	NA	NA	NA	NA	NA	NA	NA	Experimental - deliberate disease model	No	Treat	No	NA	NA	NA	NA	NA	NA	NA	NA	NA	NA	NA	NA	NA	NA	NA	NA	NA	NA	NA	NA	NA	NA
19293	3	2016	Australia	NA	NA	NA	NA	NA	NA	Horse	NA	NA	NA	NA	NA	NA	NA	NA	NA	NA	NA	NA	NA	Experimental - deliberate disease model	No	Treat	No	NA	NA	NA	NA	NA	NA	NA	NA	NA	NA	NA	NA	NA	NA	NA	NA	NA	NA	NA	NA	NA	NA
21768	3	2017	Australia	NA	NA	NA	NA	NA	NA	Horse	NA	NA	NA	NA	NA	NA	NA	NA	NA	NA	NA	NA	NA	Experimental - deliberate disease model	No	Treat	Yes	3	Yes	Yes (specify product name)	gemultiforal honey (Capilano Premium 100% Australian Blend, Capilano Honey Pty Ltd, QLD, Aust)	No	NA	No	NA	NA	NA	NA	NA	Yes	Yes (specify product name)	UMF5 (Honey New Zealand UMF5 + Manuka Honey)	No	NA	No	NA	NA	NA	NA
21852	3	2013	Australia	NA	NA	NA	NA	NA	NA	Horse	NA	NA	NA	NA	NA	NA	NA	NA	NA	NA	NA	NA	NA	Experimental - deliberate disease model	No	Treat	Yes	2	Yes	Yes (specify product name)	UMF 20 manuka honey (Summer Glow Apiaries Ltd, Hamilton, New Zealand)	No	NA	No	NA	NA	NA	NA	NA	Yes	Yes (specify product name)	UMF 20 manuka honey gel (Nature Vet Pty Ltd)	No	NA	No	NA	NA	NA	NA
21854	3	2011	Australia	NA	NA	NA	NA	NA	NA	Horse	NA	NA	NA	NA	NA	NA	NA	NA	NA	NA	NA	NA	NA	Experimental - deliberate disease model	No	Treat	No	NA	NA	NA	NA	NA	NA	NA	NA	NA	NA	NA	NA	NA	NA	NA	NA	NA	NA	NA	NA	NA	NA
21948	3	2015	Australia	NA	NA	NA	NA	NA	NA	Horse	NA	NA	NA	NA	NA	NA	NA	NA	NA	NA	NA	NA	NA	Experimental - deliberate disease model	No	Treat	No	NA	NA	NA	NA	NA	NA	NA	NA	NA	NA	NA	NA	NA	NA	NA	NA	NA	NA	NA	NA	NA	NA
21961	3	2013	Egypt	NA	NA	NA	NA	NA	NA	NA	NA	NA	NA	Donkey	NA	NA	NA	NA	NA	NA	NA	NA	NA	Experimental - deliberate disease model	No	Treat	No	NA	NA	NA	NA	NA	NA	NA	NA	NA	NA	NA	NA	NA	NA	NA	NA	NA	NA	NA	NA	NA	NA
40105	3	2015	Jordan	NA	NA	NA	NA	NA	Dog	NA	NA	NA	NA	NA	NA	NA	NA	NA	NA	NA	NA	NA	NA	Experimental - deliberate disease model	No	Treat	No	NA	NA	NA	NA	NA	NA	NA	NA	NA	NA	NA	NA	NA	NA	NA	NA	NA	NA	NA	NA	NA	NA
48807	3	2013	Brazil	NA	NA	NA	NA	NA	NA	NA	NA	NA	NA	NA	NA	NA	Fish	NA	NA	NA	NA	NA	NA	Experimental - deliberate disease model	No	Treat	No	NA	NA	NA	NA	NA	NA	NA	NA	NA	NA	NA	NA	NA	NA	NA	NA	NA	NA	NA	NA	NA	NA
[truncated: 79 more columns]
